# Supplementary material
Source: PubMed Central journal article supplement (PMC4371932)
Supplement: pnas.1421975112.sapp.pdf [file pnas.1421975112.sapp.pdf]

## **Supporting Information (SI Appendix)**

**The RNA binding protein FXR1 is a new driver in the 3q26-29 amplicon and predicts poor prognosis in human cancers**

Jun Qian, Mohamed Hassanein, Megan D. Hoeksema , Bradford K. Harris , Yong Zou, Heidi Chen, Pengcheng Lu, Rosana Eisenberg, Jing Wang, Allan V Espinosa, Xiangming Ji, Fredrick T. Harris, S.M. Jamshedur Rahman and Pierre P. Massion

**Supplementary methods**

**Supplementary references**

**Supplementary figures 1-7 and legends**

**Supplementary tables 1-34**

## **Supplementary methods**

### **Array Comparative Genomic Hybridization (array CGH)**

Digestion, labeling, and hybridization were performed at the Vanderbilt Genome Sciences Resource Core by following Agilent's protocol version 4.0 for Agilent Human Genome CGH 244A oligo microarrays. The hybridized arrays were washed and scanned using an Agilent scanner. The array images were then analyzed using Agilent Feature Extraction Software (version 9.5.3.1), which also performs dye normalization for the data. The array CGH data have been deposited in NCBI's Gene Expression Omnibus (GEO)(1) and are accessible through GEO Series accession number GSE40048

(<http://www.ncbi.nlm.nih.gov/geo/query/acc.cgi?token=vtgbnumkuqmgng&acc=GSE40048>).

### **Gene Expression Microarray**

Evaluation of gene expression was performed at Vanderbilt Genome Sciences Resource Core using the Agilent Human Gene Expression 4 × 44K Microarray platform using manufacturer-recommended procedures for microarray-based one-color assay. The array was scanned and then analyzed using Agilent Feature Extraction Software (version 10.7.1.1). The expression data have been deposited in NCBI's Gene Expression Omnibus(1) and are accessible through GEO Series accession number GSE40074

(<http://www.ncbi.nlm.nih.gov/geo/query/acc.cgi?token=rlezrggikiiiaqry&acc=GSE40074>).

### **Gene Copy Number and Expression Data Analysis**

Array CGH data obtained (n=24) in our laboratory and from dataset GSE20393 (n=45) were analyzed using Agilent DNA Analytics Software (version 4.0) with ADM-2 algorithm. The average log<sub>2</sub> ratio of 0.8 was defined as the cut-off for amplification or 0.3 for low level gain. Genomic positions are mapped to the hg18 genome build.

For mRNA microarray expression analysis on 24 SCCs and the samples in NCBI GEO database GSE31552, the raw data and associated sample information were loaded and processed by GeneSpring11 (Agilent Technologies). The normalized data of FXR1, FMR1, FXR2, ECT2 and PRKCI were used in GraphPad Prism 5.0 to calculate statistical significance (t test).

For TCGA datasets, copy number and mRNA expression data (IlluminaHiSeq\_RNASeqV2) in 18 types of human cancers were downloaded using the UCSC Cancer Genomics Browser (2). Copy-number alteration determined using GISTIC was used for analysis. Total tumor samples of each type of cancer were summarized in *SI Appendix* Table S10 (updated May 2014). Gene copy number and mRNA expression in lung cancer cell lines were directly downloaded from the Cancer Cell line Encyclopedia database (3).

For other expression datasets publically available, total five lung adenocarcinoma datasets (caArray, GSE31210, GSE3141, GSE37745 and Bhattacharjee 2001, see detailed description in *SI Appendix*, Table S9)(4-8), seven breast cancer datasets (GSE3494, GSE4922, GSE2034, GSE2603, GSE11121, GSE7390 and METABRIC, see detailed description in *SI Appendix*, Table S11-18)(9-15), three ovarian cancer datasets (GSE14764, GSE26712 and GSE9891, see detailed description in *SI Appendix*, Table S27)(16-18) and one HNSC dataset (E-TABM-302, *SI Appendix*, Table S29-30)(19) were analyzed. Expression data from Gene Expression Omnibus (GEO) database were collected as CEL files, and normalization was done using the *r*MA function of Bioconductor (20) or directly downloaded from Insilico Database (21) or KM plotter database (22). Head and neck SCC cohort E-TABM-302 is available at Arrayexpress database (<http://www.ebi.ac.uk/arrayexpress/experiments/E-TABM-302/>). The METABRIC breast cancer cohort (EGAS00000000083) is available at the European Genome-phenome Archive (EGA).

### **Dual-Color Interphase FISH Assay**

One TMA including 49 lung SCC tumors was used for assessment of FXR1 gene CN using dual color fluorescence in situ hybridization (FISH). BAC clones for specific genes were selected from different libraries: FXR1 (RP11-905N10, RP11-282H19) and centromeric chromosome 3 (CEP3) probes were purchased from Vysis. Tissue hybridization, washing, color detection and scoring were performed as described previously (23).

### **Cell Cultures, Plasmids, and Reagents**

Five human squamous carcinoma cell lines (H520, HCC95, HCC15, H157, and SW900), five human lung adenocarcinoma cell lines (H1819, H1648, H2882, A549 and H23), two large-cell carcinoma cell lines (H1299 and H460), and one immortalized epithelial cell line (BEAS-2B) were purchased from the American Type Culture Collection. Dr. Jennifer A. Pietenpol kindly provided seven breast cancer and five head&neck

squamous cancer cell lines. Dr. Dineo Khabele kindly provided two ovarian cancer cell lines. HBEC3KT cells were a generous gift from Dr. John D. Minna (24, 25). HEK293T cells were a gift from Dr. David Carbone. All cancer cell lines were maintained in RPMI or DMEM with 10% fetal bovine serum (FBS). Beas-2b and HEK293T cells were maintained in DMEM with 10% FBS. HBEC3KT cells were plated on porcine collagen I-coated tissue culture dishes containing K-SFM media (Invitrogen). All cells were grown in 1 mM penicillin/streptomycin. The PKC inhibitor chelerythrine chloride and propidium iodide (PI) were purchased from Sigma-Aldrich. Chelerythrine was dissolved in DMSO and PI was dissolved in sterile water for in vitro experiments.

The expression plasmid wild type pHACE-PRKCI-WT tagged human influenza hemagglutinin (HA) was obtained from Addgene (plasmid# 21252). Dominant negative pHACE-PRKCI-DN was generated by ligating full-length open reading frames of PRKCI with a dominant negative K3M point mutation at the ATP binding site and then subcloned into pHACE digested with EcoRI (26). For overexpression of FXR1, full-length cDNA of FXR1 was PCR based on the plasmid pCMV-SPORT6-FXR1 (Openbiosystems), subcloned into BamHI and XhoI sites of pBabe-hygro vector (Addgene plasmid#1756), Flag tagged pCMV-Tag4A vector, or Flag tagged pBabe-hygro vector and then confirmed by double-strand sequencing.

### **RNAi Knockdown Assay**

For transient siRNA transfection, siPORT™ NeoFX™ Transfection Agent, Silencer Negative Control siRNA, Opti-MEM I, Silencer Select pre-designed siRNA products were purchased from Invitrogen. The Two small interfering RNAs sequences are as follows: for siRNA-FXR1, (siRNA ID# s15612, 5' CGAGCUGAGUGAUUGGUCAtt; antisense, UGACCUCACUCAGCUCGtc; siRNA ID# s15612, sense, CGAGCUGAGUGAUUGGUCAtt, antisense, UGACCAAUCACUCAGCUCGtc); for siRNA-PRKCI (siRNA ID# S11111, sense, GGAUAUGAUGGAGCAAAAAtt, antisense, UUUUUGCUCCAUCAUAUCCca; siRNA ID# s11112, sense, GUAUUCCAUAUAAUCCUtt, antisense, AAGGAUUUAUGGAAUUActg). siRNA were suspended in water at a concentration of 20 nmol/L. The transfections were performed according to the manufacturer's instructions or as previously described (27). For stably silencing FXR1 in H520 cells, three individual pGIPZ lentiviral shRNA-FXR1 and one pGIPZ non-silencing shRNA lentiviral control vector was purchased from Open Biosystems. Transfection and transduction were conducted according to manufacturer's

instructions or as previously described (27). Briefly, H520 cells were plated the day before infection and subsequently incubated with virus in 8  $\mu$ g/ml polybrene for 6 h. Puromycin (1.5  $\mu$ g) was added the following day. After selection, various cell colonies were tested for FXR1 expression using immunoblotting. The colonies showing knockdown of FXR1 were plated for soft agar colony formation assay, cell invasion assay and flow cytometry assay.

### **Retroviral Introduction of FXR1**

Stable transfection of pBabe-hygro-FXR1 or pBabe-Flag-hygro-FXR1 and empty vector into HBEC3KT or BEAS-2B cells was conducted as previously described (27). Hygromycin was added 48 h post-transfection at a final concentration of 4  $\mu$ g/mL to obtain stable colonies overexpressing FXR1. Protein expression was confirmed via immunoblotting with antibodies against FXR1 (Sigma-Aldrich).

### **Immunoblot Analysis**

Prestige rabbit Anti-FXR1 antibody, rabbit anti  $\beta$ -actin was purchased from Sigma-Aldrich. Rabbit polyclonal ECT2 (H-300), normal rabbit IgG, normal mouse IgG were purchased from Santa Cruz Biotechnology. PKC iota (phospho T555 + T563) antibody (ab5813) was obtained from Abcam. Anti-PRKCI mouse monoclonal antibody was purchased from BD Biosciences. Rabbit polyclonal p-Erk1/2, polyclonal antibodies to poly (ADPribose) polymerase (PARP), and cleaved caspase-3 were obtained from Cell Signaling. Mouse anti-phosphoserine (clone 4A4) and rabbit anti-phosphothreonine were purchased from Millipore. Immunoblot analysis was done using standard procedures as described in our previous study (27), with detection using the enhanced chemiluminescence system (Pierce Biotechnology). Antibody dilutions for immunoblotting were 1:1,000. The blots were re-probed with an anti- $\beta$ -actin antibody to correct for protein loading differences. Anti-rabbit and anti-mouse secondary antibodies were purchased from Promega.

### **Immunoprecipitation (IP) and IP of FXR1 RNA Protein Complexes**

For regular immunoprecipitation (IP) or co-IP, isolated lung cancer cells were suspended in Ripa buffer supplemented with 1mM PMSF and protease inhibitor cocktail and kept on ice for 15 min. Soluble extracts were separated by centrifugation at 10,000 x g for 10 min. Cell extracts (300–500  $\mu$ g of total proteins) were precleared for 1 h on Protein A/G PLUS-Agarose beads (Santa Cruz Biotechnology) and collected as

supernatant after centrifugation for 1 min at 1000 x g. Supernatants were then incubated with 1-5 ug of various primary antibodies for 3 h at 4°C under constant shaking. Protein A-Dyna beads (Invitrogen) were added into the immunocomplexes for 1 additional hour. Hence, beads were washed three times with lysis buffer and adsorbed proteins were eluted in SDS-sample buffer for immunoblot analysis. In some experiments, HEK293T cells were transiently transfected with Flag-tagged pCMV-Tag4A-FXR1 and either HA-tagged pHACE-PRKCI-WT or pHACE-PRKCI-DN for 48h. Cell lysates were then subjected to IP with anti-HA or anti-Flag using protein A-Dyna beads.

Immunoprecipitation (IP) of endogenous RNA protein complexes (RNP) was done according to previously described methods (28, 29). Briefly, cytoplasmic lysates, prepared from H520 cells using lysis buffer (100 mM NaCl, 10 mM MgCl<sub>2</sub>, 30 mM Tris-HCl, pH 7.5, 1 mM dithiothreitol [DTT], protease inhibitor cocktail, 100U/ml RNasin), supplemented with 0.1% Nonidet P40, were divided into two equal parts and incubated (1 h, 4°C) with 100 ul of a 50% (v/v) suspension of Protein-A Dyna beads precoated with 10 ug each of rabbit IgG1 (Santa Cruz Biotechnology) or anti-FXR1 (Sigma-Aldrich). The beads were washed five times with NT2 buffer (50mM Tris–Cl, 150mM NaCl, 1mM MgCl<sub>2</sub> and 0.05% NP-40). Contaminating DNA was removed from the sample by incubating the beads in 100 ml of NT2 buffer supplemented with 2 ml DNase I (Invitrogen) for 30 min at 37 °C. The beads were washed twice in NT2 buffer and bound proteins were digested by incubating the beads in 100 ml NT2 buffer containing 0.1% SDS and supplemented with 0.5 mg/ml Proteinase K for 15 min at 55 °C.

### **mRNA Stability Assay**

Actinomycin D (20 µg/mL, Sigma-Aldrich) was added to H520 shFXR1 knockdown cells or non-silencing shRNA control. Total RNA was extracted at 0, 2, 4, 6, 17, or 24 hours after the addition of actinomycin D, and quantitative real-time polymerase chain reaction (PCR) was performed (30). The mRNA decay curves were constructed and half-lives were calculated from the curves.

### **Cell Proliferation Assays**

Lung cancer cells were transiently transfected in 6-well plates with either FXR1 siRNA or negative control

siRNA as described above. The direct CyQUANT assay (Invitrogen) was then performed following the manufacturer's instructions on the wells post-transfection at indicated times up to 6 days. A representative viability experiment is shown with average standard deviation (s.d.).

### **Soft Agar Colony Formation Assay**

Anchorage-independent growth was assayed by the ability of cells to form colonies in soft agar. The bottom agar consisted of growth medium containing 10% fetal bovine serum and 0.8% agarose in 6-well plates. H520-shFXR1 and non-silencing (NT) cells were plated on top of the bottom agar at 20,000/well with growth medium containing 10% fetal bovine serum and 0.4% agarose. The cells were incubated at 37 °C in 5% CO<sub>2</sub>. Cell colonies were stained with MTT and visualized and quantified under a dissecting microscope (Olympus) after three weeks in culture.

### **Matrigel Cell Invasion Assay**

We used 6.5-mm diameter Transwell inserts (Costar) with the 8-um pore membranes coated with matrigel (BD Biosciences) to assess the invasive potential of FXR1 knockdown H520 cells. A total of  $5 \times 10^4$  H520-NT and H520-shFXR1 cells in 0.2 mL were prepared and seeded onto the upper chamber of a Transwell and the lower chamber was filled with 400 uL of RPMI with 10% fetal bovine serum. After a 24 h incubation period, the cells in the upper chamber that didn't migrate were gently scraped away and adherent cells present on the lower surface of the insert were stained with MTT, photographed and counted.

### **RT-PCR**

To measure ECT2 and GAPDH mRNA after IP of FXR1 RNP complex, RNA post IP was then extracted using phenol:chloroform and precipitated in the presence of Glycoblue (Invitrogen). Reverse transcription was carried out using the First-Strand cDNA Synthesis kit (Promega) with oligo d(T)18 primers (Applied Biosystems). Precipitated mRNA was then detected by RT-PCR and visualized on a 1.5% agarose gel by ethidium bromide staining. Alternatively, real-time PCRs were performed in triplicate with SYBR Green Mix (Bio-rad) on an iCycler apparatus (Bio-rad) with results normalized to BIM expression.

### **Flow Cytometry**

Analysis of DNA content and cell cycle of H520 and H520-FXR1 knockdown cells was performed by flow cytometry using propidium iodide (PI; Sigma-Aldrich) staining as previous described (27). A total of 10,000 to 20,000 stained nuclei were subjected to flow cytometry analysis. Data were collected on a Becton Dickinson FACSCalibur flow cytometer using CellQuest Pro software (BD Biosciences). Cell cycle analysis was done using the ModFit LT software (Verity Software House). The percentage of cells in sub-G1 was considered apoptotic.

### **Mouse Xenograft Study**

Various number ( $2-5 \times 10^6$  cells) of four cancer cell lines including H520, H1299, A2780 and SCC12 stably transfected with FXR1-shRNA knockdown (KD) and non-target (NT) shRNA control constructs were injected into the flanks of thirty-five athymic nude mice-foxn1<sup>nu</sup> (Harlan Laboratories, Indianapolis, IN, USA). Tumor growth was monitored up to 7 weeks and measured with calipers. Immunohistochemistry for FXR1 and Ki-67 was performed. Images were taken and analyzed with a Olympus BX41TF microscope and Olympus cellSens software.

### **Immunohistochemistry study on FXR1 protein in NSCLC**

Immunohistochemical staining was performed as previously described (31). Cytoplasmic staining of FXR1 was scored using the Allred system with slight modifications (32). Briefly, the staining index was considered as the sum of the intensity score (0, no staining; 1+, weak; 2+, moderate; 3+, strong) and the distribution score (0, no staining; 0.1, staining of 1%-9% of cells; 0.5, 10%-49% and 1 if >50% of cells). The final immunoreactivity H score was determined by multiplying the intensity and extent of positivity scores of stained cells, with the minimum score of 0 and a maximum score of 3. The median value of all the H scores was a priori chosen as the cutoff point for separating FXR1-high tumors from FXR1-low tumors.



## Supplementary References:

1. Edgar R, Domrachev M, & Lash AE (2002) Gene Expression Omnibus: NCBI gene expression and hybridization array data repository. *Nucleic acids research* 30(1):207-210.
2. Zhu J, *et al.* (2009) The UCSC Cancer Genomics Browser. *Nature methods* 6(4):239-240.
3. Barretina J, *et al.* (2012) The Cancer Cell Line Encyclopedia enables predictive modelling of anticancer drug sensitivity. *Nature* 483(7391):603-607.
4. Director's Challenge Consortium for the Molecular Classification of Lung A, *et al.* (2008) Gene expression-based survival prediction in lung adenocarcinoma: a multi-site, blinded validation study. *Nature medicine* 14(8):822-827.
5. Okayama H, *et al.* (2012) Identification of genes upregulated in ALK-positive and EGFR/KRAS/ALK-negative lung adenocarcinomas. *Cancer research* 72(1):100-111.
6. Bild AH, *et al.* (2006) Oncogenic pathway signatures in human cancers as a guide to targeted therapies. *Nature* 439(7074):353-357.
7. Botling J, *et al.* (2013) Biomarker discovery in non-small cell lung cancer: integrating gene expression profiling, meta-analysis, and tissue microarray validation. *Clinical cancer research : an official journal of the American Association for Cancer Research* 19(1):194-204.
8. Bhattacharjee A, *et al.* (2001) Classification of human lung carcinomas by mRNA expression profiling reveals distinct adenocarcinoma subclasses. *Proceedings of the National Academy of Sciences of the United States of America* 98(24):13790-13795.
9. Miller LD, *et al.* (2005) An expression signature for p53 status in human breast cancer predicts mutation status, transcriptional effects, and patient survival. *Proceedings of the National Academy of Sciences of the United States of America* 102(38):13550-13555.
10. Ivshina AV, *et al.* (2006) Genetic reclassification of histologic grade delineates new clinical subtypes of breast cancer. *Cancer research* 66(21):10292-10301.
11. Wang Y, *et al.* (2005) Gene-expression profiles to predict distant metastasis of lymph-node-negative primary breast cancer. *Lancet* 365(9460):671-679.
12. Minn AJ, *et al.* (2005) Genes that mediate breast cancer metastasis to lung. *Nature* 436(7050):518-524.
13. Schmidt M, *et al.* (2008) The humoral immune system has a key prognostic impact in node-negative breast cancer. *Cancer research* 68(13):5405-5413.
14. Desmedt C, *et al.* (2007) Strong time dependence of the 76-gene prognostic signature for node-negative breast cancer patients in the TRANSBIG multicenter independent validation series. *Clinical cancer research : an official journal of the American Association for Cancer Research* 13(11):3207-3214.
15. Curtis C, *et al.* (2012) The genomic and transcriptomic architecture of 2,000 breast tumours reveals novel subgroups. *Nature* 486(7403):346-352.
16. Denkert C, *et al.* (2009) A prognostic gene expression index in ovarian cancer - validation across different independent data sets. *The Journal of pathology* 218(2):273-280.
17. Bonome T, *et al.* (2008) A gene signature predicting for survival in suboptimally debulked patients with ovarian cancer. *Cancer research* 68(13):5478-5486.
18. Tothill RW, *et al.* (2008) Novel molecular subtypes of serous and endometrioid ovarian cancer linked to clinical outcome. *Clinical cancer research : an official journal of the American Association for Cancer Research* 14(16):5198-5208.
19. Rickman DS, *et al.* (2008) Prediction of future metastasis and molecular characterization of head and neck squamous-cell carcinoma based on transcriptome and genome analysis by microarrays. *Oncogene* 27(51):6607-6622.
20. McCall MN, Bolstad BM, & Irizarry RA (2010) Frozen robust multiarray analysis (fRMA). *Biostatistics* 11(2):242-253.
21. Coletta A, *et al.* (2012) InSilico DB genomic datasets hub: an efficient starting point for analyzing genome-wide studies in GenePattern, Integrative Genomics Viewer, and R/Bioconductor. *Genome biology* 13(11):R104.
22. Gyorffy B, Lanczky A, & Szallasi Z (2012) Implementing an online tool for genome-wide validation of survival-associated biomarkers in ovarian-cancer using microarray data from 1287 patients. *Endocrine-related cancer* 19(2):197-208.
23. Massion PP, *et al.* (2002) Genomic copy number analysis of non-small cell lung cancer using array comparative genomic hybridization: implications of the phosphatidylinositol 3-kinase pathway. *Cancer research* 62(13):3636-3640.
24. Ramirez RD, *et al.* (2004) Immortalization of human bronchial epithelial cells in the absence of viral oncoproteins. *Cancer research* 64(24):9027-9034.
25. Sato M, *et al.* (2006) Multiple oncogenic changes (K-RAS(V12), p53 knockdown, mutant EGFRs, p16 bypass, telomerase) are not sufficient to confer a full malignant phenotype on human bronchial epithelial cells. *Cancer research* 66(4):2116-2128.
26. Soh JW & Weinstein IB (2003) Roles of specific isoforms of protein kinase C in the transcriptional control of cyclin D1 and related genes. *J Biol Chem* 278(36):34709-34716.
27. Qian J, Zou Y, Rahman JS, Lu B, & Massion PP (2009) Synergy between phosphatidylinositol 3-kinase/Akt pathway and Bcl-xL in the control of apoptosis in adenocarcinoma cells of the lung. *Mol Cancer Ther* 8(1):101-109.
28. Paronetto MP, *et al.* (2006) The nuclear RNA-binding protein Sam68 translocates to the cytoplasm and associates with the polysomes in mouse spermatocytes. *Mol Biol Cell* 17(1):14-24.
29. Lewis SM, *et al.* (2008) The eIF4G homolog DAP5/p97 supports the translation of select mRNAs during endoplasmic reticulum stress. *Nucleic acids research* 36(1):168-178.
30. Leclerc GJ, Leclerc GM, & Barredo JC (2002) Real-time RT-PCR analysis of mRNA decay: half-life of Beta-actin mRNA in human leukemia CCRF-CEM and Nalm-6 cell lines. *Cancer Cell Int* 2(1):1.
31. Hassanein M, *et al.* (2013) SLC1A5 mediates glutamine transport required for lung cancer cell growth and survival. *Clinical cancer research : an official journal of the American Association for Cancer Research* 19(3):560-570.
32. Olausson KA, *et al.* (2006) DNA repair by ERCC1 in non-small-cell lung cancer and cisplatin-based adjuvant chemotherapy. *N Engl J Med* 355(10):983-991.

## Supplementary Figure 1-7 legends:

**Supplementary Figure 1.** *FXR1* is co-amplified and co-overexpressed with *ECT2* and *PRKCI* in lung SCC. (A) Copy number alteration of *FXR1*, *ECT2* and *PRKCI* in 24 lung SCCs (GSE40048). "2" is a high-level amplification ( $\log_2$  ratio $>0.8$ ), "1" indicates a low-level gain ( $\log_2$  ratio $>0.3$ ), "0" is diploid, "-1" is a single-copy loss (heterozygous deletion). Frequencies of high-level amplification are shown as a percentage of all cases. (B) Tumors harboring *FXR1* amplification (n=13) express higher *FXR1* mRNA than tumors without *FXR1* amplification (n=11) (\*  $p < 0.0001$ ). (C) Positive correlation between CN of *FXR1* and mRNA expression in TCGA lung SCCs (n=257). Pearson correlation P value is shown. (D) Lung SCCs (T) possess higher *FXR1*, *ECT2* and *PRKCI* mRNA level than matched normal tissues (N) in GSE31552 dataset. (E) *FXR1* copy number gain is significantly higher than *FMR1* or *FXR2* in lung SCC. Data are obtained from our study (n=24, GSE40048), Kan, Z. et al 's study (n=45, GSE20393) and TCGA (n=257). (F) Only *FXR1* is overexpressed in 18 matched SCC tumors (T) compared to non-tumor tissues (N). Data is obtained from GSE31552. (G) Only *FXR1* is overexpressed in 267 lung SCCs (T) versus 35 normal lung (N). UP: upregulated in tumor. NS: not significant. DOWN: downregulated in tumor. Data is obtained from TCGA. (H) Copy number alteration of *FXR1*, *FMR1* and *FXR2* in cell lines of lung squamous carcinoma (LUSC), adenocarcinoma (LUAD), large cell carcinoma (LUL) and small cell carcinoma (LUS). Data is obtained from the Cancer Cell line Encyclopedia database. (I) Highest coexpression correlation is observed in lung SCC cell lines compared to other types of lung cancer cell lines. Spearman correlation r value is shown. \*\*  $P < 0.001$ . Data is obtained from the Cancer Cell line Encyclopedia database.

**Supplementary Figure 2.** FXR1 regulates lung cancer cell growth *in vitro* and *vivo*. (A)

Downregulation of FXR1 protein in A549 cells treated with siRNA against *FXR1*. SC: scrambled siRNA control. si#1, si#2: two individual *FXR1* siRNA. (B) Effect of *FXR1*-shRNA on H520 anchorage-independent soft agar colony formation. Representative cell colonies stained with MTT in H520 NT and two stable FXR1 knockdown cell lines are shown. (C) Effect of *FXR1*-shRNA on H520 cell cycle distribution. Representative flow cytometry profiles and corresponding percentage of cells in G1, S, G2 phase and subG1 for each group are shown. (D) Effect of *FXR1*-shRNA on H520 cell invasion. Significant differences between H520 NT and H520/*FXR1* KD cells are indicated; \*  $p < 0.05$ , \*\*  $p < 0.01$ . (E) Immunoblot analysis of HBEC3KT or BEAS-2B cells ectopically overexpressing FXR1 by using the indicated antibodies. (F) Effects of *FXR1* knockdown on tumorigenicity in nude mice. Tumors ( $\text{mm}^3$ ) from four mice on indicated days are shown on left. Scale bars, 5 mm. Five mice with tumors ( $\text{mm}^3$ ) at 6 weeks are shown on right. The P values (determined by Student's t test) are relative to tumors formed by shRNA control cells. Scale bars, 5 mm. (G) Representative H&E staining, immunohistochemistry staining of FXR1 and Ki67 in tumors formed by H520 NT and H520 KD cells in mice #246 and #247. Magnification in all images is 200x. Scale bars, 100  $\mu\text{m}$ . (H) Effects of FXR1 knockdown on tumorigenicity of H1299 cancer cells in nude mice. Five mice with tumors ( $\text{mm}^3$ ) at four weeks are shown. The P values (determined by Student's t test) are relative to tumors formed by shRNA control (NT) cells.

**Supplementary Figure 3.** FXR1 regulates ECT2 and PRKCI expression via distinct

mechanisms. (A) Downregulation of ECT2, PRKCI and phospho-ERK1/2 in *FXR1* knockdown H1299 and H520 cells using siRNA against *FXR1*. (B) Immunoprecipitation of FXR1 or PRKCI co-precipitates PRKCI or FXR1 but not ECT2 in HCC95, A549 and H520 cells. (C) Immunoprecipitation of PRKCI or PRDA6A reveals that FXR1 binds to PRKCI but not PARD6A

in H520 cells. (D) Immunoprecipitation of PRKCI or PRDA6A reveals that FXR1 binds to PRKCI but not PARD6A in HCC95 or A549 cells. (E) Immunoprecipitation of endogenous ECT2 does not co-precipitate either FXR1 or PRKCI in H520 and A549 cells. (F) Immunoprecipitation of FXR1 reveals that FXR1 binds to PRKCI in a panel of NSCLC cells. (G) Immunoprecipitation with PRKCI co-precipitates FXR1 in H520 cells but not normal immortalized lung epithelial cell lines such as Beas2b, HBEC3KT or HBEC3KTR. Expression of FXR1 is confirmed in total cell lysates (input). (H) Immunoprecipitation of phospho-PRKCI T555 or FXR1 reveals that FXR1 binds to phosphorylated PRKCI T555 in H520 cells. (I) Immunoprecipitation of phosphothreonine or phosphoserine reveals that FXR1 is bound to phosphothreonine and phosphoserine in H520 cells, respectively. Co-precipitated PRKCI bound to phosphothreonine or phosphoserine was used as a positive control for IP. (J) FXR1 is a threonine phosphorylated protein in H520 cells. H520 cell lysates were precipitated using anti-FXR1 or anti-rabbit IgG and then blotted with anti-phosphothreonine. Co-precipitated phospho-serine/ threonine PRKCI was used as a positive control. (K) Immunoprecipitation of phosphoserine co-precipitated FXR1 or PRKCI in HCC95, H1648 and H1819 cells. (L) Immunoprecipitation of phosphorylated PRKCI-T555 co-precipitates FXR1 in indicated NSCLC cell lines. (M) HEK293T cells were co-transfected with Flag-tagged pCMV-Tag4A-FXR1 and either HA-tagged pHACE-PRKCI-WT or pHACE-PRKCI-DN for 48h. Cell lysates were then subjected to IP with anti-HA, anti-Flag, anti-FXR1 or anti-PRKCI. The IP experiments reveal that active PRKCI but not the PRKCI DN mutant binds to FXR1. (N) H520 cells were treated with PKC inhibitor chelerythrine at the indicated dose or time course and total cell lysates were subjected to immunoblot analysis. The inhibition of PKC activity leads to the downregulation of phosphorylated PRKCI T555, FXR1 and apoptosis as indicated by cleaved PARP in H520 cells. (O) Chelerythrine reduces levels of phosphorylated PRKCI T555 and decreases both FXR1 and ECT2 expression in H520, HCC95 and H1299 cells. (P) Quantitative RT-PCR reveals significant fold enrichment of *ECT2* mRNA in lysate prepared from H520 cells subjected to immunoprecipitation using a normal IgG or anti-

FXR1. (Q) Half-life of *ECT2* mRNA is decreased in H520/FXR1 KD cells ( $10.8 \pm 2.4$ h) compared to H520/NT cells ( $24.2 \pm 3.5$  h),  $p < 0.01$ .

**Supplementary Figure 4.** FXR1 expression is correlated with non-small cell lung cancer squamous histology, disease stage and smoking status. *P* value was calculated using Kruskal-Wallis test. Characteristics of the patients are summarized in *SI Appendix*, Table S5.

**Supplementary Figure 5.** FXR1 overexpression correlates with poor clinical outcomes in multiple cancers. (A) Copy number alteration of *FXR1* in TCGA datasets including lung squamous cell carcinoma (LUSC,  $n=343$ ), ovarian cancer (OV,  $n=559$ ), cervical cancer (CESC,  $n=102$ ) and head & neck squamous carcinoma (HNSC,  $n=306$ ). The values are derived from the copy number analysis algorithms GISTIC. "2" is a high-level amplification, "1" indicates a low-level gain, "0" is diploid, "-1" is a single-copy loss (heterozygous deletion). Frequencies of high-level amplification were shown as a percentage of all cases. (B) FXR1 is overexpressed in basal-like ( $n=331$ ) and luminal B (Lu-B,  $n=492$ ) subtype of breast cancer (METABRIC cohort,  $n=1992$ ). *P* value was calculated using Kruskal-Wallis Test. FXR1 is overexpressed in TCGA ovarian tumors ( $n=568$ ) compared with in normal samples ( $n=8$ ). FXR1 is overexpressed in TCGA HNSC ( $n=497$ ) compared with in normal samples ( $n=43$ ). (C) Immunoblot analysis of a panel of 14 cancer cell lines including seven breast cancer cell lines, five HNSC cell lines and two ovarian cancer cell lines for FXR1 and  $\beta$ -actin. FXR1 is overexpressed in 11 out of 14 examined cancer cell lines. (D) Downregulation of FXR1 protein in A2780 cells treated with shRNA against FXR1. NT: non-target shRNA control. KD: shRNA FXR1 knockdown. (E) Effects of FXR1 knockdown on tumorigenicity in nude mice. A2780 NT and A2780 FXR1 KD cells were injected subcutaneously into the flanks of nude mice ( $n=5$ ). Tumor volume was measured twice a week in all experiments by caliper and calculated by the formula:  $V = 3.14$  (smaller

diameter)<sup>2</sup>(larger diameter)/6. The quantification of tumor volume over a 4-week period is shown; \* p<0.05. (F) Representative H&E staining, immunohistochemistry staining of FXR1 and Ki-67 in tumors formed by A2780 NT and A2780 KD in one mouse was shown on left. Scale bars, 50 um. (G) Effects of FXR1 knockdown on tumorigenicity of A2780 and SCC12 cancer cells in nude mice. Five mice with tumors (mm<sup>3</sup>) per cell line at four weeks are shown. The P values (determined by Student's t test) are relative to tumors formed by shRNA control (NT) cells.

**Supplementary Figure 6.** Higher *FXR1* mRNA level in both tumor (T) and normal lung tissues (N) compared to *FMR1* or *FXR2* in lung squamous cell carcinoma (LUSC) or head and neck squamous cell carcinoma (HNSC). Data is obtained from TCGA.

**Supplementary Figure 7.** FXR1 mRNA level is correlated with smoking history. In contrast to mRNA levels of *FMR1* and *FXR2*, FXR1 mRNA level is significantly higher in cancer patients who are smokers (Student's t test) in TCGA lung (n=971) and head&neck squamous carcinoma (HNSC, n=497) cohorts.

**Figure. S1**

**A**

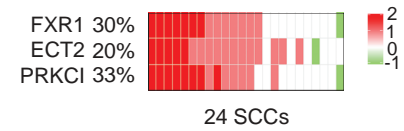

**B**

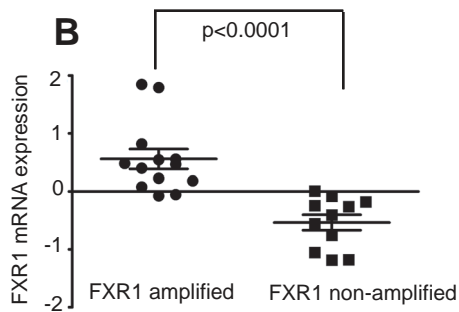

**C**

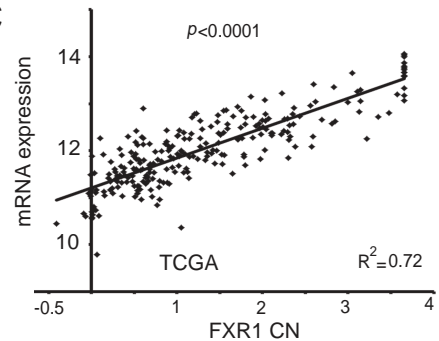

**D**

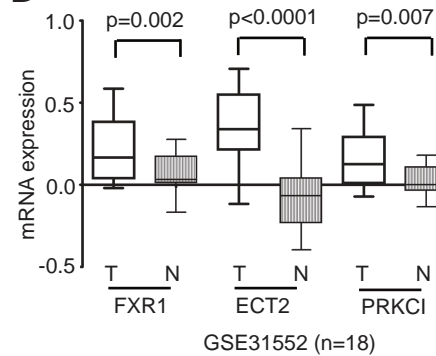

**E**

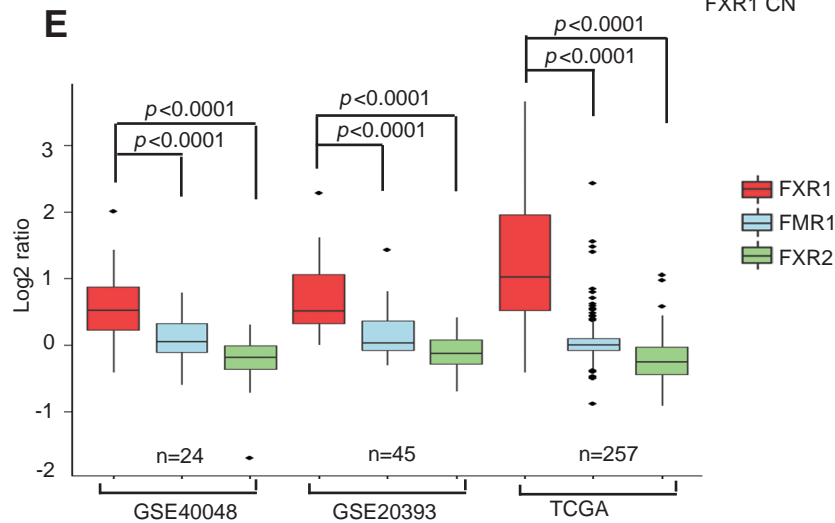

**F**

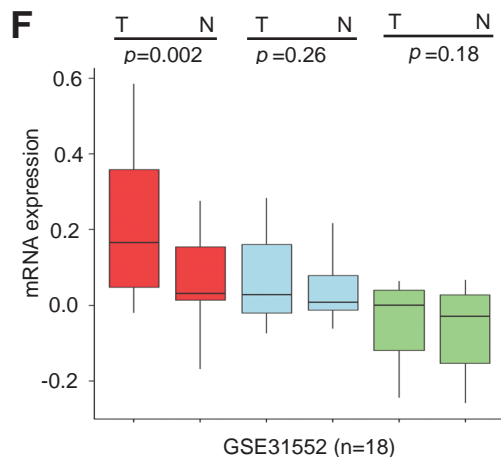

**G**

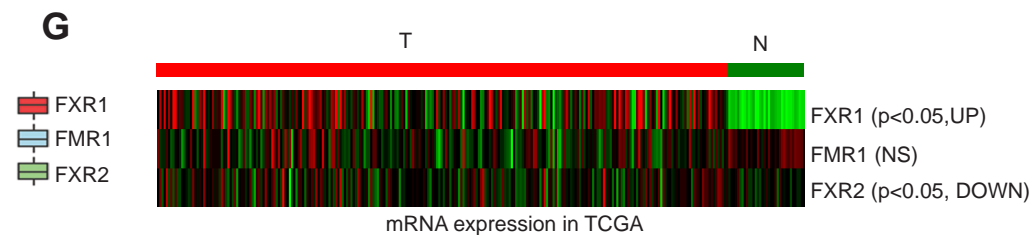

**H**

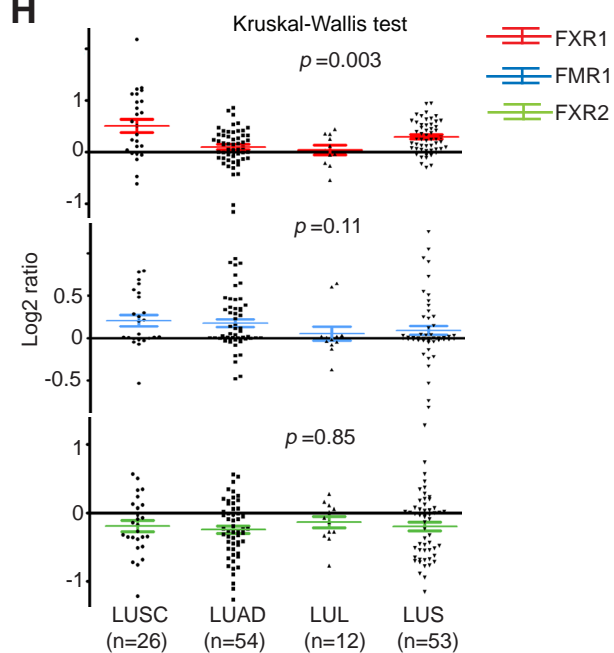

**I**

|      | FXR1<br>ECT2 | FXR1<br>PRKCI | ECT2<br>PRKCI |
|------|--------------|---------------|---------------|
| LUSC | 0.51**       | 0.63**        | 0.59**        |
| LUAD | 0.26         | 0.09          | 0.42**        |
| LUL  | 0.03         | 0.38          | -0.09         |
| LUS  | 0.36         | 0.52**        | 0.21          |

**Figure. S2**

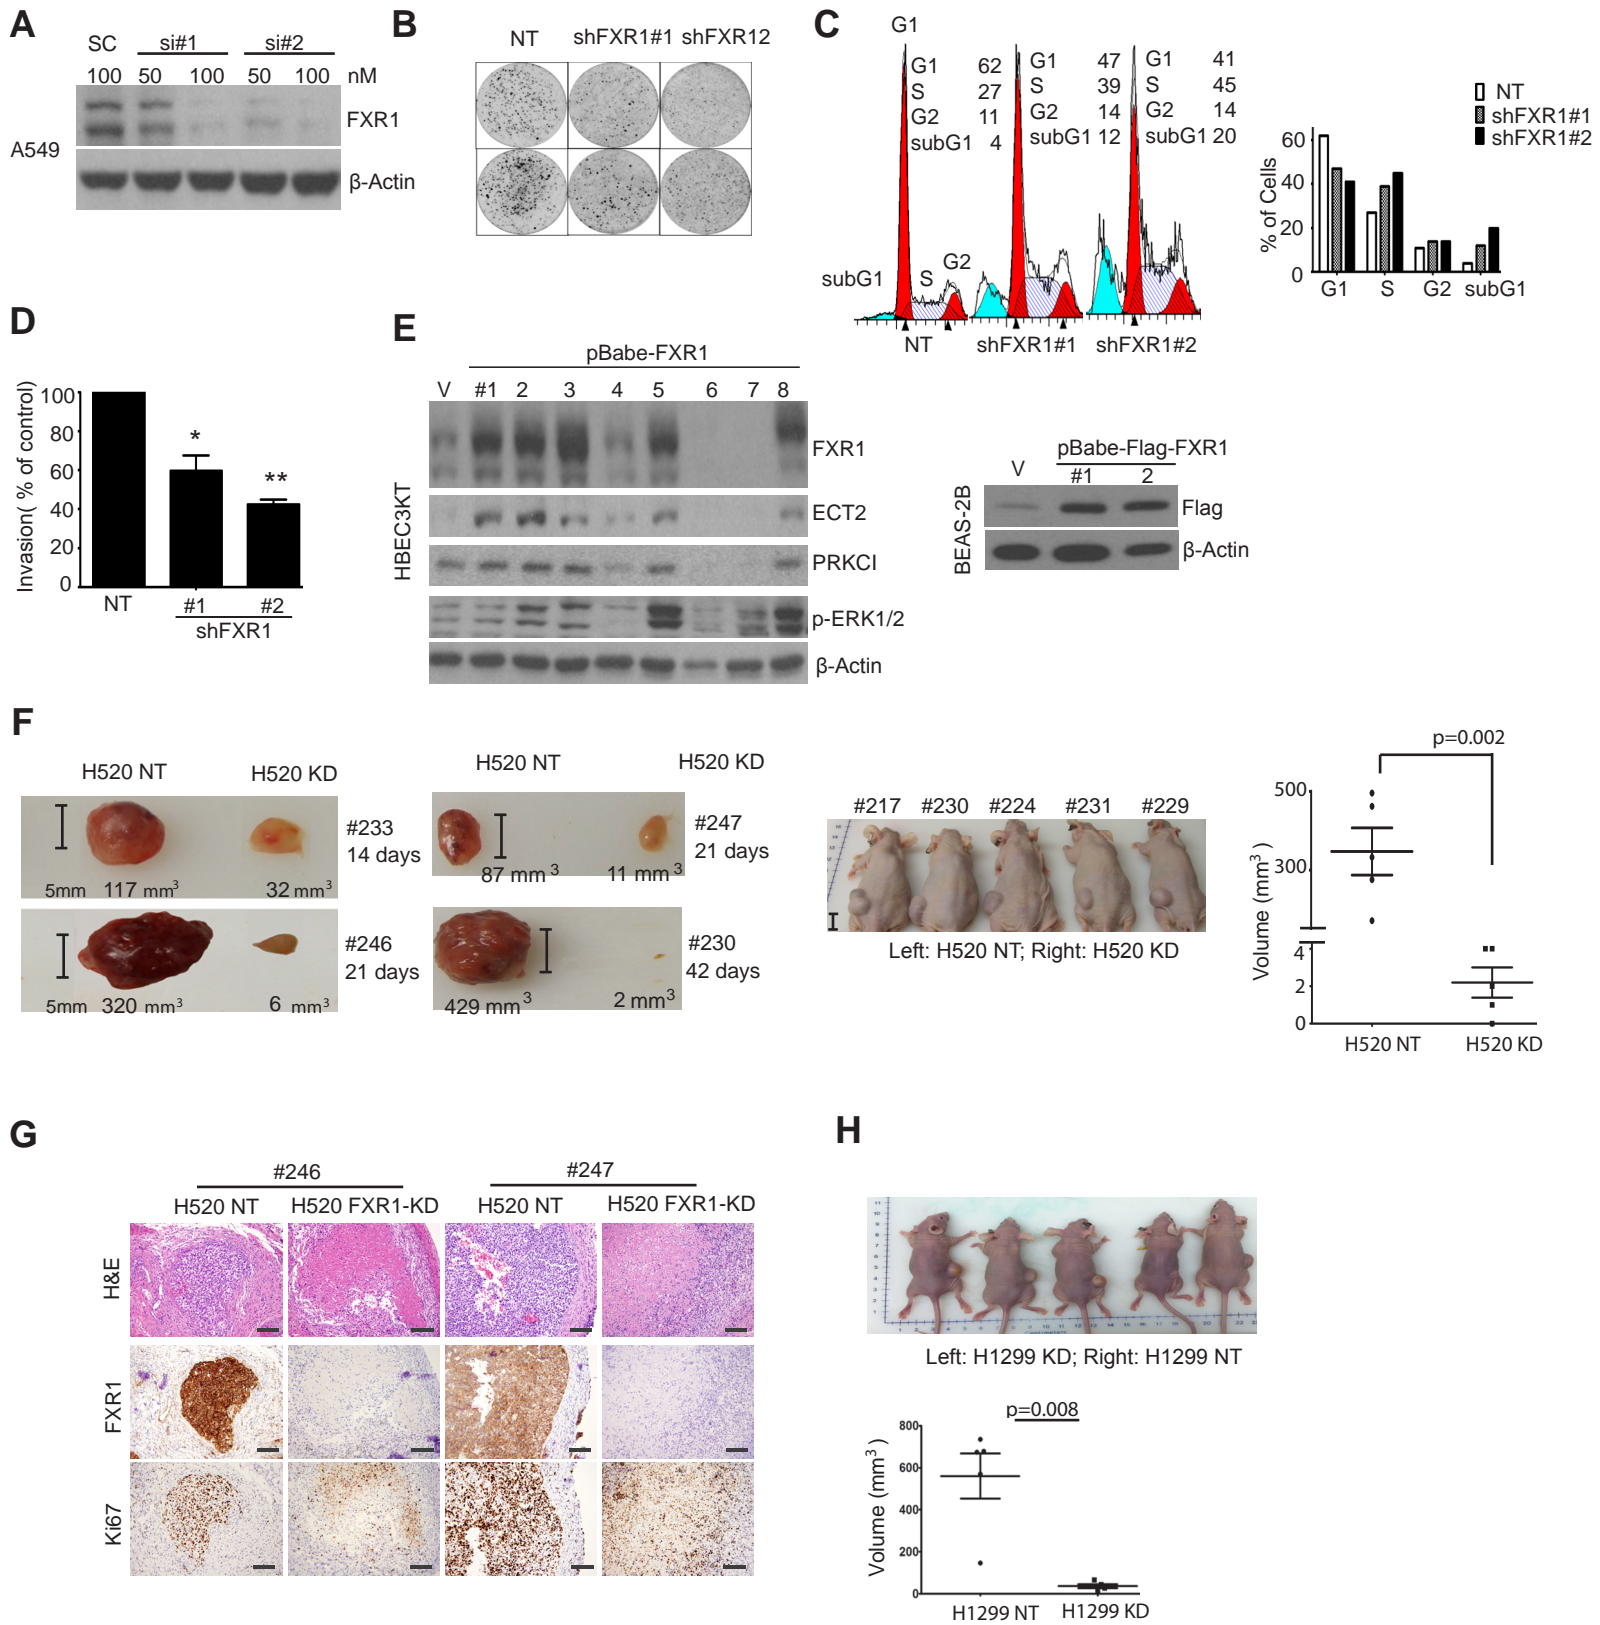



**Figure S3**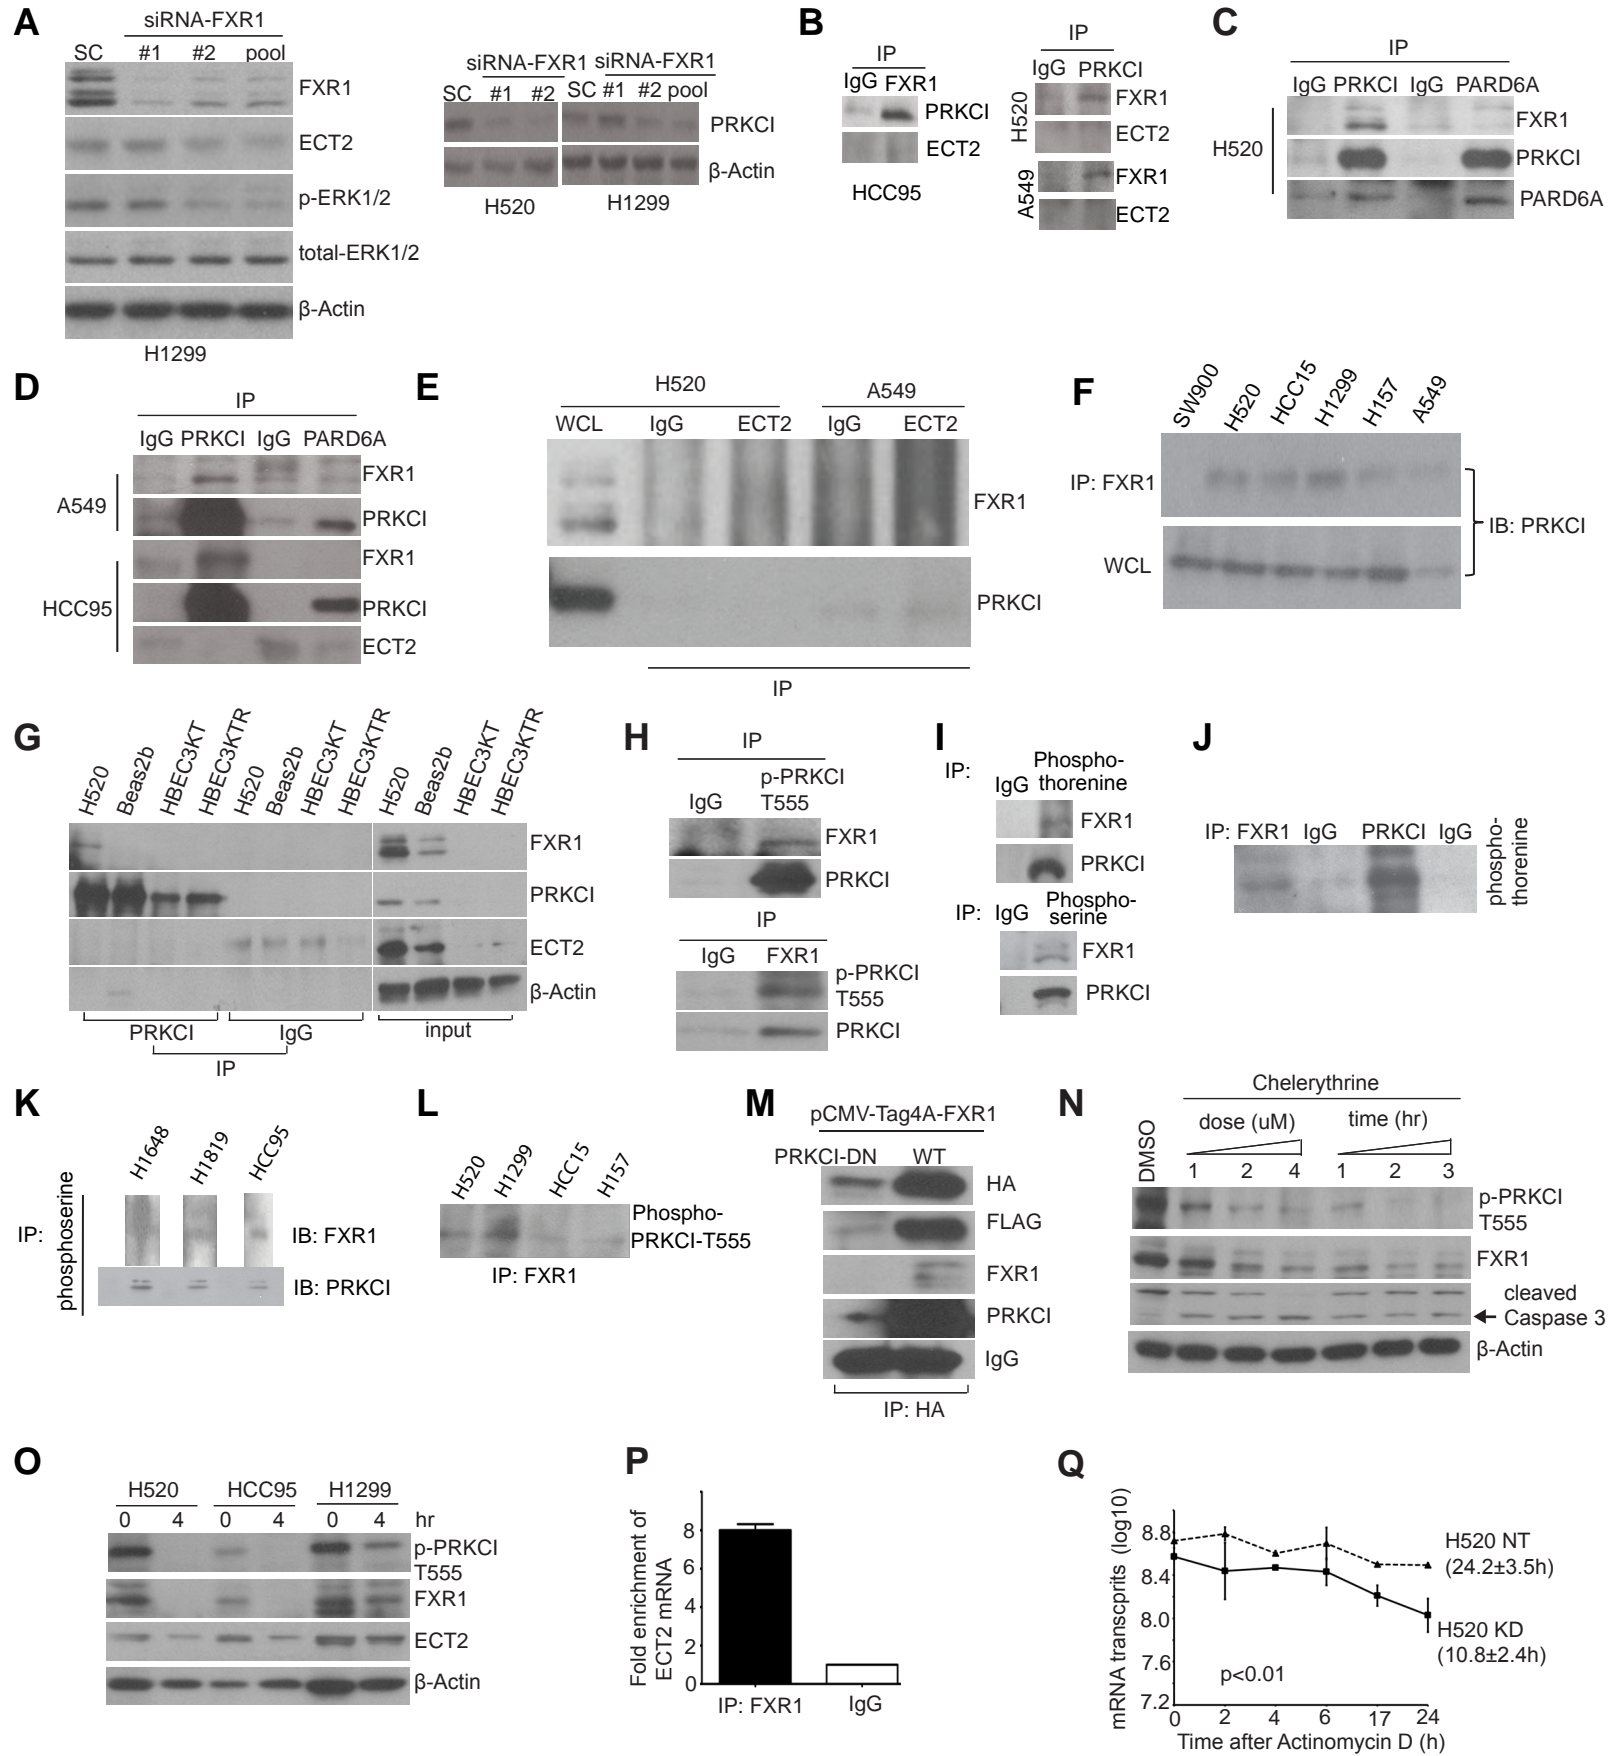

Figure. S4

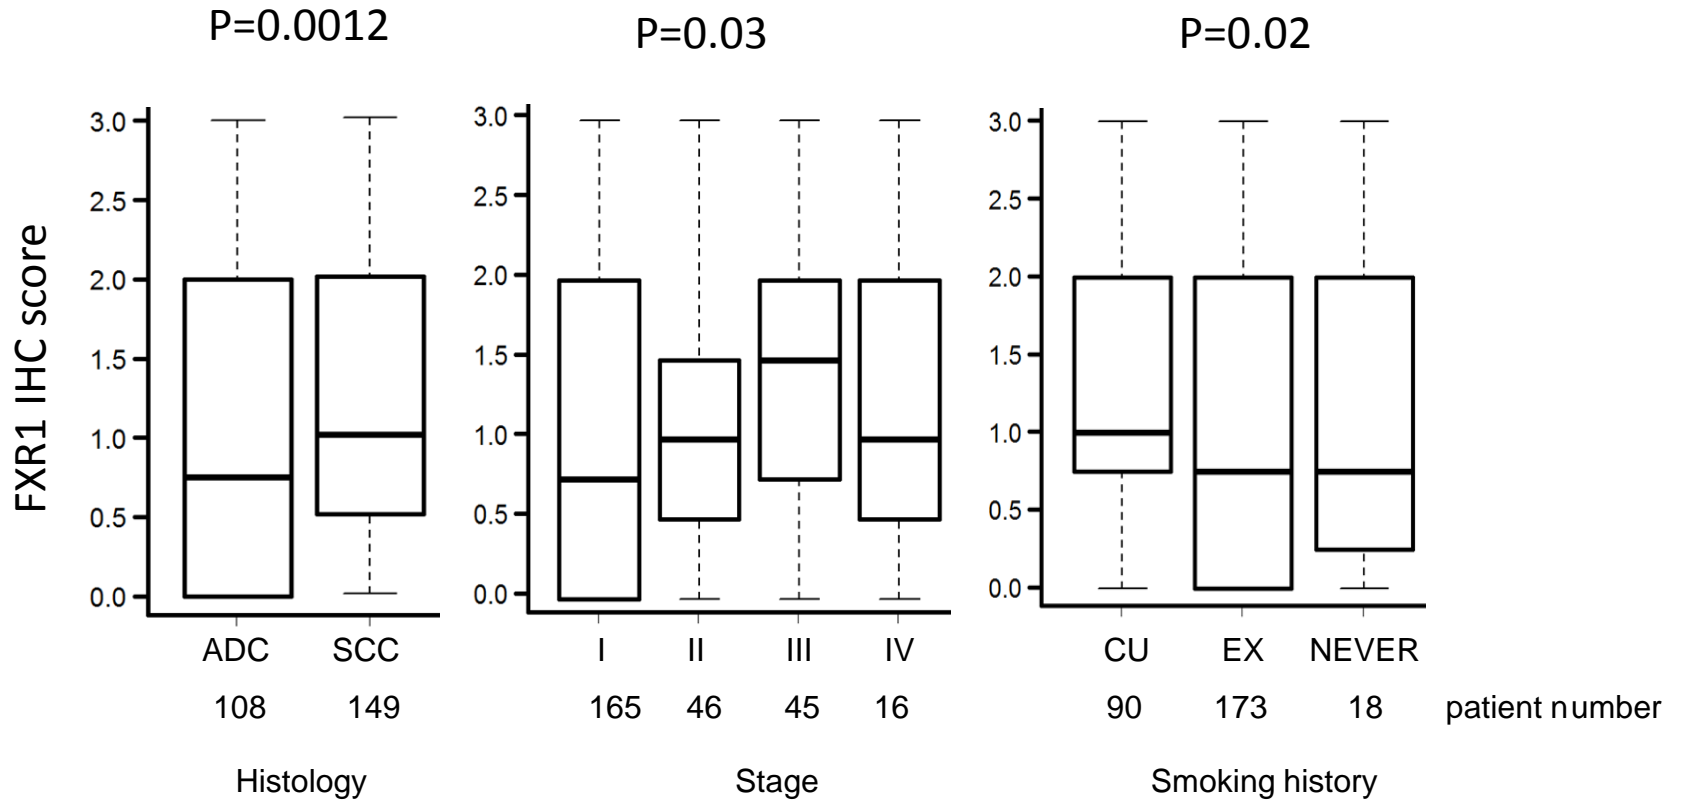

**Figure. S5****A**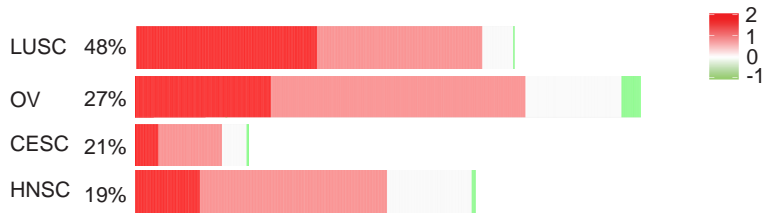**B**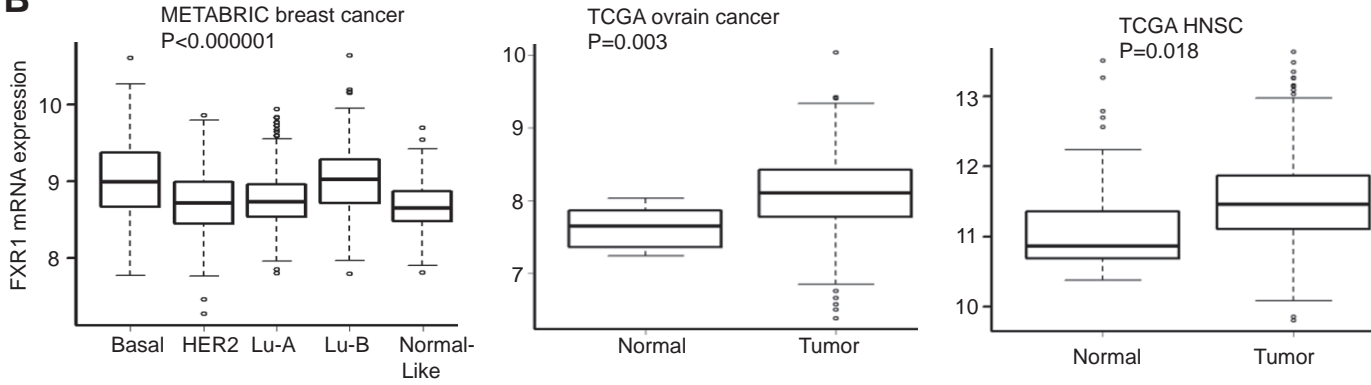**C**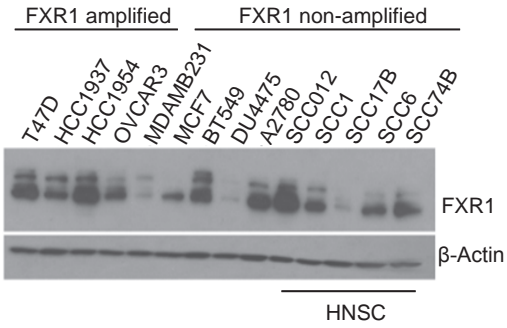**D**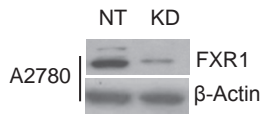**E**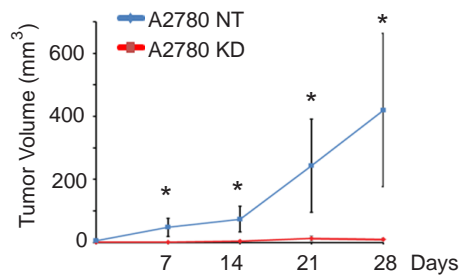**F**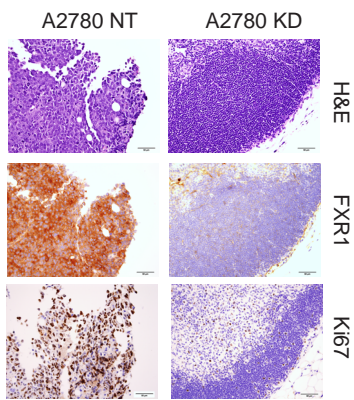**G**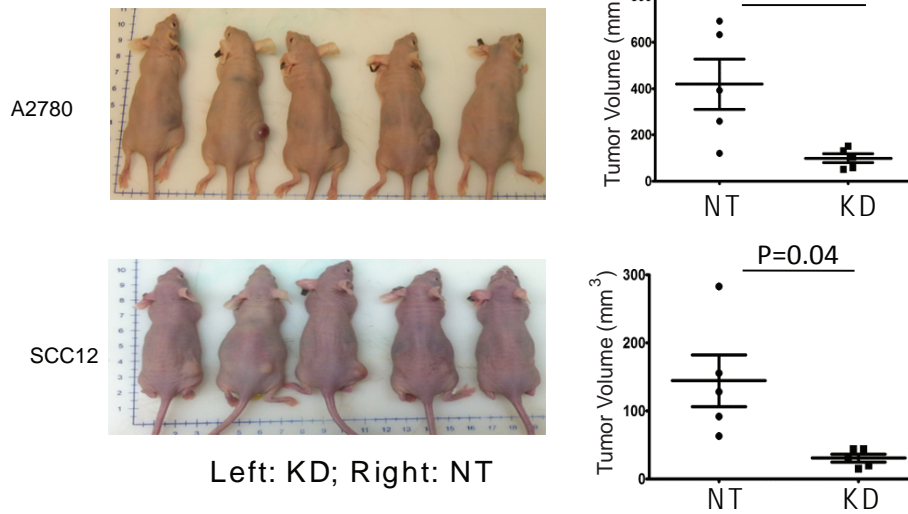

Left: KD; Right: NT

Figure. S6

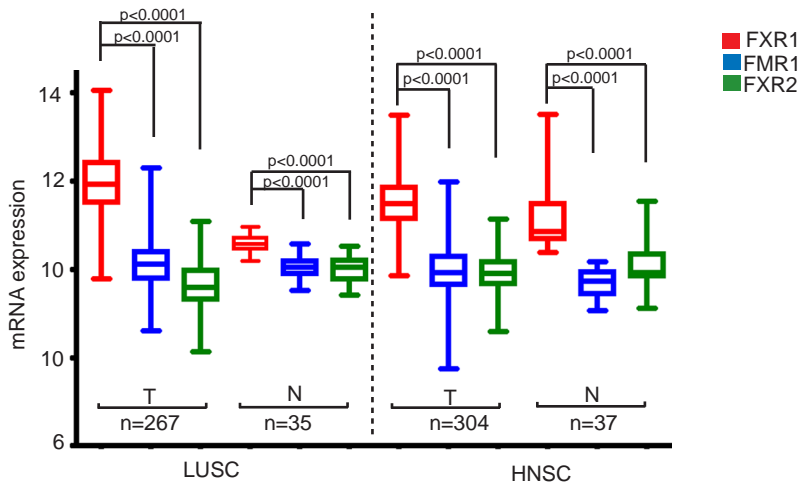

Figure S7

Never smoker (n=89)  
Smoker (n=835)

Never smoker (n=85)  
Smoker (n=302)

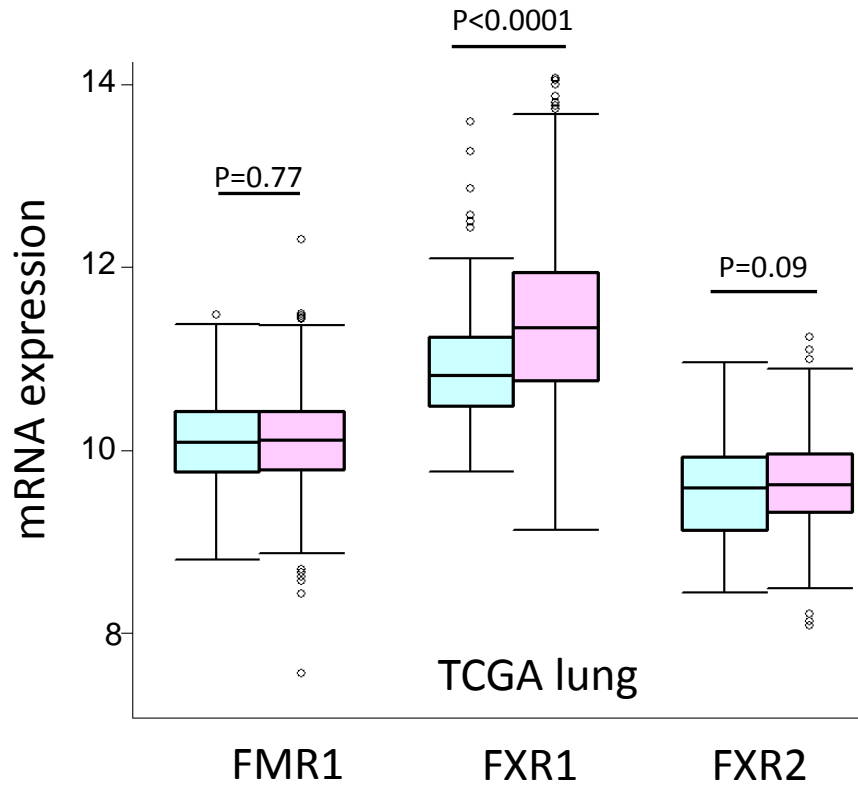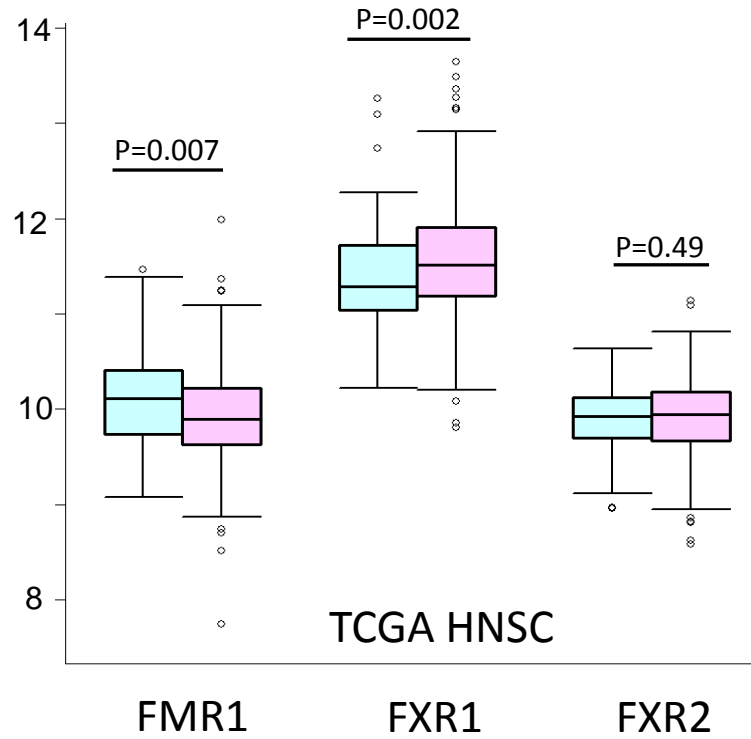

**Table S1. Most highly correlated genes to FXR1 on 3q amplicon in 19 SCC tumors**

| Gene Symbol | Pearson Correlation |
|-------------|---------------------|
| FXR1        | 1                   |
| ECT2        | 0.93850122          |
| PSMD2       | 0.923744576         |
| POLR2H      | 0.9173129           |
| ABCF3       | 0.9071726           |
| EIF4A2      | 0.903446895         |
| ABCC5       | 0.898564126         |
| RFC4        | 0.888882401         |
| PARL        | 0.8847963           |
| SENP2       | 0.8779619           |
| SFRS10      | 0.8714842           |
| RPL39L      | 0.868759553         |
| MFN1        | 0.8675731           |
| EIF2B5      | 0.8660367           |
| PRKCI       | 0.860323008         |
| MRPL47      | 0.8501934           |
| DVL3        | 0.8288864           |
| MYNN        | 0.8239362           |
| PDCD10      | 0.82119603          |
| CLCN2       | 0.8138976           |
| MAGEF1      | 0.8001603           |
| AP2M1       | 0.7947156           |
| EIF4G1      | 0.790344            |
| DNAJB11     | 0.7899947           |
| SOX2        | 0.771896225         |
| PLD1        | 0.7580384           |
| PIK3CA      | 0.718942096         |
| EHHADH      | 0.7161602           |
| FETUB       | 0.7020755           |
| SKIL        | 0.6934548           |

**Table S2.** Positive correlation between FXR1 and ECT2, PRKCI mRNA expression in lung SCCs.

| Datasets | Genes      | Pearson Correlation |              |            |              |
|----------|------------|---------------------|--------------|------------|--------------|
|          |            | SCC (n=50)          |              | ADC (n=55) |              |
| TCGA     | FXR1_ECT2  | 0.78                | $p < 0.0001$ | 0.68       | $p < 0.0001$ |
|          | FXR1_PRKCI | 0.77                | $p < 0.0001$ | 0.38       | $p = 0.004$  |
| GSE31552 | FXR1_ECT2  | 0.69                | $p = 0.001$  | 0.20       | $p = 0.25$   |
|          | FXR1_PRKCI | 0.82                | $p < 0.0001$ | 0.49       | $p = 0.003$  |

Table S3. Most highly correlated genes to FXR1 on 3q amplicon in TCGA lung SCC (n=257)

| Gene Symbol | Pearson Correlation | p Value |
|-------------|---------------------|---------|
| ZNF639      | 0.787925247         | 0       |
| PIK3CA      | 0.761063701         | 0       |
| PSMD2       | 0.741544455         | 0       |
| DVL3        | 0.731518907         | 0       |
| ATP11B      | 0.720195633         | 0       |
| SENP2       | 0.714989202         | 0       |
| DNAJC19     | 0.704312391         | 0       |
| YEATS2      | 0.686002512         | 0       |
| ACTL6A      | 0.685794741         | 0       |
| DCUN1D1     | 0.67809138          | 0       |
| MFN1        | 0.676019592         | 0       |
| ALG3        | 0.675245529         | 0       |
| * PRKCI     | 0.674432227         | 0       |
| MRPL47      | 0.669660818         | 0       |
| TBL1XR1     | 0.668826344         | 0       |
| VPS8        | 0.668466414         | 0       |
| MAGEF1      | 0.667226559         | 0       |
| ABCF3       | 0.666559205         | 0       |
| EIF2B5      | 0.666384745         | 0       |
| * ECT2      | 0.65647635          | 0       |
| ABCC5       | 0.642872105         | 0       |
| PHC3        | 0.642526007         | 0       |
| CLCN2       | 0.638330205         | 0       |
| PARL        | 0.628753793         | 0       |
| DNAJB11     | 0.621220659         | 0       |
| OPA1        | 0.617025421         | 0       |
| POLR2H      | 0.612882691         | 0       |
| SOX2        | 0.609279715         | 0       |
| MCCC1       | 0.606010135         | 0       |



**Table S4.** Positive correlation among FXR1 and ECT2, PRKCI gene CN in lung SCCs.

|            | TCGA (n=257) |                  | GSE20393 (n=45) |                  | GSE40048 (n=24) |                  |
|------------|--------------|------------------|-----------------|------------------|-----------------|------------------|
|            | r            | <i>p</i>         | r               | <i>p</i>         | r               | <i>p</i>         |
| FXR1_ECT2  | 0.88         | <i>p</i> <0.0001 | 0.80            | <i>p</i> <0.0001 | 0.87            | <i>p</i> <0.0001 |
| FXR1_PRKCI | 0.86         | <i>p</i> <0.0001 | 0.86            | <i>p</i> <0.0001 | 0.94            | <i>p</i> <0.0001 |
| ECT2_PRKCI | 0.96         | <i>p</i> <0.0001 | 0.97            | <i>p</i> <0.0001 | 0.89            | <i>p</i> <0.0001 |

**Table S5.** Clinical characteristics of NSCLC patients (TMA, n=292)

---

|                 |           |
|-----------------|-----------|
| Age             | 65±10.78  |
| Gender          |           |
| Female          | 110 (39%) |
| Male            | 172 (61%) |
| Stage           |           |
| I               | 165 (60%) |
| II              | 46 (17%)  |
| III             | 45 (17%)  |
| IV              | 16 (6%)   |
| Subtype         |           |
| ADC             | 108 (37%) |
| LCC             | 11 (4%)   |
| SCC             | 149 (51%) |
| NSCLC           | 24 (8%)   |
| Smoking history |           |
| Current smoker  | 90 (32%)  |
| Ex-smoker       | 173 (62%) |
| Never smoker    | 18 (6%)   |

---

**Table S6. Multivariable Cox proportional hazards analysis of overall survival in 292 NSCLC patients.**

| Covariate               | HR   | 95% C.I. |      | P       |
|-------------------------|------|----------|------|---------|
| FXR1                    | 1.27 | 1.09     | 1.49 | 0.003   |
| Age                     | 1.01 | 0.99     | 1.02 | 0.270   |
| Gender (Male vs Female) | 1.13 | 0.85     | 1.49 | 0.430   |
| Stage                   |      |          |      |         |
| II vs I                 | 2.20 | 1.45     | 3.33 | <0.0001 |
| III vs I                | 2.55 | 1.85     | 3.52 | <0.0001 |
| IV vs I                 | 3.92 | 2.60     | 5.90 | <0.0001 |
| Smoking history*        |      |          |      |         |
| EX vs CU                | 0.73 | 0.54     | 0.97 | 0.030   |
| Never vs CU             | 0.48 | 0.25     | 0.91 | 0.024   |

\*EX: ex-smoker, CU: current smoker

**Table S7.** Multivariable Cox proportional hazards analysis of overall survival in 161 stage I NSCLC patients.

| <b>Covariate</b>           | <b>HR</b> | <b>95% C.I.</b> |      | <b>P</b> |
|----------------------------|-----------|-----------------|------|----------|
| FXR1                       | 1.32      | 1.05            | 1.65 | 0.016*   |
| Age                        | 1.01      | 0.99            | 1.03 | 0.499    |
| Gender (Male vs Female)    | 1.13      | 0.73            | 1.74 | 0.579    |
| Smoking history (EX vs CU) | 1.11      | 0.71            | 1.76 | 0.642    |

**Table S8.** Multivariable Cox proportional hazards analysis of overall survival in 78 stage I lung SCC patients.

| <b>Covariate</b>           | <b>HR</b> | <b>95% C.I.</b> |      | <b>P</b> |
|----------------------------|-----------|-----------------|------|----------|
| FXR1                       | 1.42      | 1.02            | 1.99 | 0.037*   |
| Age                        | 1.01      | 0.98            | 1.04 | 0.46     |
| Gender (Male vs Female)    | 1.03      | 0.50            | 2.11 | 0.94     |
| Smoking history (EX vs CU) | 1.09      | 0.54            | 2.22 | 0.8      |

**Table S9.** Clinical characteristics of six lung ADC datasets

| Dataset       | Platform | Sample size | Median OS | NO.of deaths | Meidan RFS | No. of Relapse | Age    | Gender (% male) | % of never smokers | Histology (% A/S/L) | Stage (% 1/2/3/4) | Grade (% poor/moderate/well) | % Adjuvant chemotherapy |
|---------------|----------|-------------|-----------|--------------|------------|----------------|--------|-----------------|--------------------|---------------------|-------------------|------------------------------|-------------------------|
| caArray       | GPL96    | 462         | 3.88      | 236          | 2.75       | 205            | 64±10  | 50              | 11                 | 100/0/0             | 32/54/6/3         | 36/45/13                     | 19                      |
| GSE31210      | GPL570   | 226         | 4.85      | 35           | 4.54       | 64             | 59±7.4 | 46              | 51                 | 100/0/0             | 74/26/0/0         | -                            | 7                       |
| GSE3141       | GPL570   | 111         | 2.58      | 58           | -          | -              | -      | -               | -                  | 52/48/0             | 30/-              | -                            | -                       |
| GSE37745      | GPL570   | 196         | 3.44      | 145          | 1.68       | 49             | 63±9.2 | 55              | -                  | 54/34/12            | 66/18/14/2        | -                            | 15                      |
| TCGA ADC      | RNAseq   | 488         | 1.08      | 117          | 0.92       | 96             | 65±9.7 | 42              | 15                 | 100/0/0             | 55/23/17/5        | -                            | 1                       |
| Bhattacharjee |          | 126         | 2.95      | 71           | -          | -              | 63±10  | 42              | -                  | 100/0/0             | 67/21/9/3         | -                            | -                       |
| Total         |          | 1609        | 3.27      | 662          | 2.47       | 414            | 65±9.8 | 45% (n=724)     | 25% (n=294)        | 80/16/3             | 56/30/11/4        | 36/45/13                     | 10% (n=141)             |

**Table S10.** Copy number and mRNA expression of FXR1 in multiple human cancers

| Cancer Types                          |            | Amplification | Sample numbers <sup>a</sup> | mRNA expression <sup>b</sup> |
|---------------------------------------|------------|---------------|-----------------------------|------------------------------|
| Lung squamous cell carcinoma          | (LUSC)     | 48.33%        | 490                         | <b>UP</b>                    |
| Ovarian serous cystadenocarcinoma     | (OV)       | 27.07%        | 569                         | <b>UP</b>                    |
| Head and Neck squamous cell carcinoma | (HNSC)     | 21.35%        | 452                         | <b>UP</b>                    |
| Cervical squamous cell carcinoma      | (CESC)     | 19.30%        | 171                         | NS                           |
| Uterine Corpus Endometrioid Carcinoma | (UCEC)     | 8.17%         | 514                         | NS                           |
| Stomach adenocarcinoma                | (STAD)     | 6.65%         | 331                         | <b>UP</b>                    |
| Bladder Urothelial Carcinoma          | (BLCA)     | 4.07%         | 221                         | NS                           |
| Breast invasive carcinoma             | (BRCA)     | 3.57%         | 1007                        | <b>UP<sup>c</sup></b>        |
| Glioblastoma multiforme               | (GBM)      | 3.04%         | 560                         | <b>UP</b>                    |
| Pancreatic adenocarcinoma             | (PAAD)     | 2.47%         | 81                          | NS                           |
| Lung adenocarcinoma                   | (LUAD)     | 2.23%         | 493                         | <b>UP</b>                    |
| Prostate adenocarcinoma               | (PRAD)     | 2.16%         | 278                         | NS                           |
| Liver hepatocellular carcinoma        | (LIHC)     | 1.82%         | 165                         | <b>UP</b>                    |
| Kidney renal clear cell carcinoma     | (KIRC)     | 1.79%         | 504                         | <b>UP</b>                    |
| Brain Lower Grade Glioma              | (LGG)      | 1.10%         | 365                         | NA                           |
| Kidney renal papillary cell carcinoma | (KIRP)     | 0.00%         | 172                         | NS                           |
| Colon and Rectum adenocarcinoma       | (COADREAD) | 0.00%         | 589                         | <b>UP</b>                    |
| Thyroid carcinoma                     | (THCA)     | 0.00%         | 494                         | NS                           |

a. The sample numbers are number of samples that only have been measured for copy number.

b. mRNA expression was calculated by the comparison between FXR1 level in tumors and normal tissues.

p<0.05 means significant change. UP: upregulated in tumors. NA: not available (due to a lack of the data from the normal tissues. NS: not significant. c. FXR1 mRNA is upregulated in basal-like subtype of breast cancer.

**Table S11.** Clinical characteristics of breast cancer patients  
(GSE3494, n=250)

| Covariates            | Patient number | (%)   |
|-----------------------|----------------|-------|
| Age (mean±SD)         | 62±14          |       |
| Tumor size            |                |       |
| ≤20mm                 | 128            | (51%) |
| >20mm                 | 123            | (49%) |
| Estrogen receptor     |                | (%)   |
| Positive              | 213            | (86%) |
| Negative              | 34             | (14%) |
| Progesterone receptor |                | (%)   |
| Positive              | 190            | (76%) |
| Negative              | 61             | (24%) |
| Grade                 |                | (%)   |
| I                     | 67             | (27%) |
| II                    | 128            | (51%) |
| III                   | 54             | (22%) |
| Lymph Node status     |                | (%)   |
| Positive              | 84             | (35%) |
| Negative              | 158            | (65%) |
| p53 status            |                | (%)   |
| Mutant                | 58             | (23%) |
| Wild type             | 193            | (77%) |
| PAM50 subtype         |                | (%)   |
| Basal-like            | 34             | (15%) |
| Her2                  | 28             | (12%) |
| Luminal A             | 83             | (36%) |
| Luminal B             | 30             | (13%) |
| Normal Like           | 53             | (23%) |



**Table S12.** Clinical characteristics of breast cancer patients (GSE4922, n=249)

| Covariates        | Patient number | (%)   |
|-------------------|----------------|-------|
| Age (mean±SD)     |                | 62±14 |
| Tumor size        |                |       |
| <=20mm            | 126            | (51%) |
| >20mm             | 123            | (49%) |
| Estrogen receptor |                | (%)   |
| Positive          | 211            | (86%) |
| Negative          | 34             | (14%) |
| Grade             |                | (%)   |
| I                 | 68             | (24%) |
| II                | 166            | (57%) |
| III               | 55             | (19%) |
| Lymph Node status |                | (%)   |
| Positive          | 81             | (34%) |
| Negative          | 159            | (66%) |
| p53 status        |                | (%)   |
| Mutant            | 58             | (23%) |
| Wild type         | 189            | (77%) |
| PAM50 subtype     |                | (%)   |
| Basal-like        | 24             | (12%) |
| Her2              | 36             | (17%) |
| Luminal A         | 65             | (31%) |
| Luminal B         | 85             | (40%) |

**Table S13.** Clinical characteristics of breast cancer patients (GSE2034, n=286)

| Covariates        | Patient number | (%)        |
|-------------------|----------------|------------|
| Age (mean±SD)     |                | 52±12      |
| Tumor size        |                |            |
| ≤20mm             |                | 8 (3%)     |
| >20mm             |                | 278 (97%)  |
| Estrogen receptor |                | (%)        |
| Positive          |                | 209 (73%)  |
| Negative          |                | 77 (27%)   |
| Grade             |                | (%)        |
| I                 |                | 7 (4%)     |
| II                |                | 42 (21%)   |
| III               |                | 148 (75%)  |
| Lymph Node status |                | (%)        |
| Negative          |                | 286 (100%) |
| PAM50 subtype     |                | (%)        |
| Basal-like        |                | 49 (17%)   |
| HER2-enriched     |                | 9 (3%)     |
| Luminal A         |                | 104 (36%)  |
| Luminal B         |                | 124 (43%)  |

**Table S14.** Clinical characteristics of breast cancer patients (GSE2603, n=121)

| Covariates            | Patient number | (%)   |
|-----------------------|----------------|-------|
| Age (mean±SD)         | 56±14          |       |
| Tumor size            |                |       |
| ≤20mm                 | 15             | (15%) |
| >20mm                 | 84             | (85%) |
| Estrogen receptor     |                | (%)   |
| Positive              | 57             | (58%) |
| Negative              | 42             | (42%) |
| Progesterone receptor |                | (%)   |
| Positive              | 43             | (44%) |
| Negative              | 55             | (56%) |
| HER2                  |                | (%)   |
| Positive              | 26             | (30%) |
| Negative              | 62             | (70%) |
| Lymph Node status     |                | (%)   |
| Positive              | 64             | (65%) |
| Negative              | 35             | (35%) |
| PAM50 subtype         |                | (%)   |
| Basal-like            | 24             | (24%) |
| Her2                  | 15             | (15%) |
| Luminal A             | 33             | (33%) |
| Luminal B             | 7              | (7%)  |
| Normal-like           | 20             | (20%) |
| van't Veer Signature  |                | (%)   |
| Good                  | 37             | (45%) |
| Bad                   | 45             | (55%) |

**Table S15.** Clinical characteristics of breast cancer patients (GSE11121, n=200)

| Covariates        | Patient number | (%)    |
|-------------------|----------------|--------|
| Age (mean±SD)     |                | 60±12  |
| Tumor size        |                |        |
| ≤20mm             | 112            | (56%)  |
| >20mm             | 88             | (44%)  |
| Estrogen receptor |                | (%)    |
| Positive          | 148            | (80%)  |
| Negative          | 36             | (20%)  |
| Grade             |                | (%)    |
| I                 | 29             | (15%)  |
| II                | 136            | (68%)  |
| III               | 35             | (17%)  |
| Lymph Node status |                | (%)    |
| Negative          | 200            | (100%) |
| PAM50 subtype     |                | (%)    |
| Basal-like        | 38             | (15%)  |
| Her2              | 25             | (12%)  |
| Luminal A         | 17             | (36%)  |
| Luminal B         | 57             | (13%)  |
| Normal-like       | 63             | (23%)  |

**Table S16.** Clinical characteristics of the TCGA breast cancer cohort of patients with invasive ductal carcinoma (n=453)

| Covariates            | Patient number Percentage |
|-----------------------|---------------------------|
| Age (mean±SD)         | 57±13                     |
| T stage               |                           |
| T1                    | 118 (26%)                 |
| T2                    | 275 (61%)                 |
| T3                    | 38 (9%)                   |
| T4                    | 19 (4%)                   |
| M stage               |                           |
| M1                    | 12 (97%)                  |
| M0                    | 437 (3%)                  |
| Lymph Node status     |                           |
| Positive              | 221 (49%)                 |
| Negative              | 231 (51%)                 |
| Estrogen receptor     |                           |
| Positive              | 339 (76%)                 |
| Negative              | 107 (24%)                 |
| Progesterone receptor |                           |
| Positive              | 288 (65%)                 |
| Negative              | 157 (35%)                 |
| HER2                  |                           |
| Positive              | 71 (16%)                  |
| Negative              | 364 (84%)                 |
| PAM50 subtype         |                           |
| Basal-like            | 89 (20%)                  |
| HER2-enriched         | 54 (12%)                  |
| Luminal A             | 185 (43%)                 |
| Luminal B             | 111 (25%)                 |
| Death event           | 50 (12%)                  |
| Censoring             | 377 (88%)                 |

**Table S17.** Clinical characteristics of breast cancer patients (METABRIC, n=1992)

| Covariates            | Patient number (%) |
|-----------------------|--------------------|
| Age (mean±SD)         | 61±13              |
| stage                 |                    |
| I                     | 372 (35%)          |
| II                    | 579 (55%)          |
| III                   | 90 (9%)            |
| IV                    | 10 (1%)            |
| Tumor size            |                    |
| ≤20mm                 | 862 (44%)          |
| >20mm                 | 1110 (56%)         |
| Lymph Node status     |                    |
| Positive              | 1042 (52%)         |
| Negative              | 943 (48%)          |
| Estrogen receptor     |                    |
| Positive              | 1518 (76%)         |
| Negative              | 474 (24%)          |
| Progesterone receptor |                    |
| Positive              | 1049 (53%)         |
| Negative              | 943 (47%)          |
| HER2                  |                    |
| Positive              | 249 (12%)          |
| Negative              | 1743 (88%)         |
| PAM50 subtype         |                    |
| Basal-like            | 331 (17%)          |
| HER2                  | 240 (12%)          |
| Luminal A             | 721 (36%)          |
| Luminal B             | 492 (25%)          |
| Normal-like           | 202 (10%)          |

**Table S18.** Clinical characteristics of breast cancer patients (TRANSBIG, n=198)

| Covariates        | Patient number (%) |
|-------------------|--------------------|
| Age (mean±SD)     | 46±7.2             |
| Tumor size        |                    |
| ≤20mm             | 102 (52%)          |
| >20mm             | 96 (48%)           |
| Grade             | (%)                |
| I                 | 30 (15%)           |
| II                | 83 (42%)           |
| III               | 83 (42%)           |
| Estrogen receptor | (%)                |
| Negative          | 64 (32%)           |
| Positive          | 132 (68%)          |
| PAM50 subtype     | (%)                |
| Basal-like        | 30 (15%)           |
| HER2              | 11 (6%)            |
| Luminal A         | 64 (32%)           |
| Luminal B         | 90 (45%)           |
| Normal Like       | 3 (2%)             |

**Table S19.** Multivariate Cox proportional-hazards analysis of the risk of distant recurrence free survival in breast cancer patients (GSE3494, n=250)

|                                             | HR   | 95% C.I |      | P     |
|---------------------------------------------|------|---------|------|-------|
| FXR1                                        | 2.23 | 1.36    | 3.66 | 0.002 |
| Age                                         | 1.01 | 0.99    | 1.03 | 0.23  |
| Tumor size (>20mm vs <20mm)                 | 1.65 | 0.97    | 2.83 | 0.07  |
| Estrogen receptor (positive vs negative)    | 1.66 | 0.67    | 4.08 | 0.27  |
| Progesterone receptor(positive vs negative) | 0.89 | 0.42    | 1.89 | 0.76  |
| Grade                                       |      |         |      |       |
| II vs I                                     | 1.11 | 0.58    | 2.15 | 0.75  |
| III vs I                                    | 1.81 | 0.72    | 4.54 | 0.2   |
| Lymph Node status (positive vs negative)    | 1.55 | 0.94    | 2.57 | 0.09  |
| P53 status (wildtype vs mutant)             | 0.79 | 0.45    | 1.39 | 0.4   |
| PAM50 subtype                               |      |         |      |       |
| HER2-enriched vs basal-like                 | 3.79 | 1.63    | 8.78 | 0.002 |
| Luminal A vs basal-like                     | 1.52 | 0.56    | 4.09 | 0.41  |
| Luminal B vs basal-like                     | 2.18 | 0.86    | 5.50 | 0.1   |
| Normal-like vs basal-like                   | 2.14 | 0.74    | 6.22 | 0.16  |



**Table S20.** Multivariate Cox proportional-hazards analysis of the risk of distant recurrence free survival in breast cancer patients (GSE4922, n=249)

|                                          | HR   | 95% C.I |       | P      |
|------------------------------------------|------|---------|-------|--------|
| FXR1                                     | 2.62 | 1.50    | 4.58  | 0.0006 |
| Age                                      | 1.02 | 1.00    | 1.04  | 0.12   |
| Tumor size (>20mm vs <20mm)              | 1.90 | 1.11    | 3.27  | 0.02   |
| Estrogen receptor (positive vs negative) | 1.37 | 0.64    | 2.96  | 0.41   |
| Grade                                    |      |         |       |        |
| II vs I                                  | 1.11 | 0.57    | 2.18  | 0.75   |
| III vs I                                 | 1.91 | 0.78    | 4.63  | 0.15   |
| Node (positive vs negative)              | 1.35 | 0.82    | 2.24  | 0.24   |
| p53 (mutant vs WT)                       | 1.38 | 0.80    | 2.38  | 0.25   |
| PAM50 subtype                            |      |         |       |        |
| Her2-enriched vs basal-like              | 5.68 | 1.83    | 17.59 | 0.003  |
| Luminal A vs basal-like                  | 3.14 | 0.86    | 11.49 | 0.082  |
| Luminal B vs basal-like                  | 2.81 | 0.82    | 9.61  | 0.098  |

**Table S21.** Multivariate Cox proportional-hazards analysis of the risk of distant recurrence free survival in breast cancer patients (GSE2034, n=286)

| Covariates                               | HR   | 95% C.I |      | P     |
|------------------------------------------|------|---------|------|-------|
| FXR1                                     | 2.06 | 1.30    | 3.24 | 0.002 |
| Age                                      | 0.99 | 0.97    | 1.00 | 0.14  |
| Tumor size (>20mm vs <20mm)              | 0.63 | 0.09    | 4.55 | 0.64  |
| Grade (III vs I and II)                  | 2.22 | 1.12    | 4.39 | 0.02  |
| Estrogen receptor (positive vs negative) | 1.17 | 0.58    | 2.35 | 0.67  |
| PAM50 subtype                            |      |         |      |       |
| Basal-like vs other*                     | 0.86 | 0.39    | 1.86 | 0.7   |

\*other includes HER2-enriched (n=9), Luminal A (n=104) and Luminal B (n=124)

**Table S22.** Multivariate Cox proportional-hazards analysis of the risk of distant recurrence free survival in breast cancer patients (GSE2603, n=121)

|                                              | HR   | 95% C.I |       | P    |
|----------------------------------------------|------|---------|-------|------|
| FXR1                                         | 2.86 | 1.26    | 6.48  | 0.01 |
| Age                                          | 1.03 | 1.00    | 1.07  | 0.06 |
| Tumor size (>20mm vs <20mm)                  | 0.62 | 0.23    | 1.71  | 0.35 |
| Estrogen receptor (positive vs negative)     | 1.29 | 0.29    | 5.73  | 0.74 |
| Progesterone receptor (positive vs negative) | 1.30 | 0.40    | 4.28  | 0.66 |
| HER2( positive vs negative)                  | 0.21 | 0.04    | 1.03  | 0.05 |
| Lymph node (positive vs negative)            | 0.95 | 0.39    | 2.35  | 0.91 |
| PAM50 subtype                                |      |         |       |      |
| HER2-enriched vs basal-like                  | 2.75 | 0.70    | 10.86 | 0.14 |
| Luminal A, B vs basal-like                   | 0.49 | 0.08    | 3.02  | 0.44 |
| Normal-like vs basal-like                    | 1.13 | 0.29    | 4.48  | 0.86 |
| van't Veer Signature (good vs bad)           | 0.74 | 0.24    | 2.26  | 0.59 |

**Table S23.** Multivariate Cox proportional-hazards analysis of the risk of distant recurrence free survival in breast cancer patients (GSE11121, n=200)

|                                          | HR    | 95% C.I |      | P     |
|------------------------------------------|-------|---------|------|-------|
| FXR1                                     | 1.21  | 1.44    | 7.75 | 0.005 |
| Age                                      | -0.01 | 0.96    | 1.03 | 0.71  |
| Tumor size (>20mm vs <20mm)              | 0.20  | 0.61    | 2.46 | 0.57  |
| Estrogen receptor (positive vs negative) | -0.21 | 0.32    | 2.04 | 0.66  |
| Grade                                    |       |         |      |       |
| II vs I                                  | 0.24  | 0.41    | 3.89 | 0.68  |
| III vs I                                 | 0.84  | 0.60    | 9.05 | 0.22  |
| PAM50 subtype                            |       |         |      |       |
| Her2-enriched vs basal-like              | 0.71  | 0.71    | 5.81 | 0.18  |
| Luminal A vs basal-like                  | -0.03 | 0.17    | 5.63 | 0.97  |
| Luminal B vs basal-like                  | -0.07 | 0.29    | 3.04 | 0.91  |
| Normal-like vs basal-like                | 0.15  | 0.36    | 3.75 | 0.8   |

**Table S24.** Multivariate Cox proportional-hazards analysis of the risk of overall survival in the TCGA breast invasive ductal carcinoma cohort (n=453)

|                                              | HR   | 95% C.I |       | P    |
|----------------------------------------------|------|---------|-------|------|
| FXR1                                         | 2.75 | 1.11    | 6.84  | 0.03 |
| Age                                          | 1.04 | 1.01    | 1.07  | 0.01 |
| M stage (M1 vs M0)                           | 2.26 | 0.76    | 6.76  | 0.14 |
| T stage                                      |      |         |       |      |
| T2 vs T1                                     | 0.81 | 0.30    | 2.17  | 0.67 |
| T3 vs T1                                     | 0.60 | 0.14    | 2.51  | 0.48 |
| T4 vs T1                                     | 0.76 | 0.16    | 3.68  | 0.73 |
| Lymph node status (positive vs negative)     | 1.73 | 0.77    | 3.91  | 0.19 |
| Estrogen receptor (positive vs negative)     | 1.26 | 0.38    | 4.15  | 0.7  |
| Progesterone receptor (positive vs negative) | 0.32 | 0.12    | 0.81  | 0.02 |
| HER2 status (positive vs negative)           | 0.35 | 0.09    | 1.37  | 0.13 |
| PAM50 subtype                                |      |         |       |      |
| HER2-enriched vs basal-like                  | 3.29 | 0.83    | 13.01 | 0.09 |
| Luminal A vs basal-like                      | 1.30 | 0.37    | 4.57  | 0.68 |
| Luminal B vs basal-like                      | 2.48 | 0.71    | 8.61  | 0.15 |

**Table S25.** Multivariate Cox proportional-hazards analysis of the risk of overall survival in breast cancer patients (TRANSBIG, n=198)

|                                          | HR   | 95% C.I |       | P    |
|------------------------------------------|------|---------|-------|------|
| FXR1                                     | 2.00 | 1.17    | 3.42  | 0.01 |
| Age                                      | 1.01 | 0.98    | 1.05  | 0.45 |
| Tumor size (>20mm vs <20mm)              | 1.39 | 0.76    | 2.55  | 0.29 |
| Estrogen receptor (positive vs negative) | 0.50 | 0.25    | 0.99  | 0.05 |
| Grade                                    |      |         |       |      |
| II vs I                                  | 1.03 | 0.43    | 2.45  | 0.95 |
| III vs I                                 | 0.68 | 0.26    | 1.79  | 0.43 |
| PAM50 subtype                            |      |         |       |      |
| Her2-enriched vs basal-like              | 3.41 | 1.04    | 11.19 | 0.04 |
| Luminal A vs basal-like                  | 0.90 | 0.28    | 2.89  | 0.86 |
| Luminal B vs basal-like                  | 1.83 | 0.72    | 4.63  | 0.21 |

**Table S26.** Multivariate Cox proportional-hazards analysis of the risk of disease specific free survival in breast cancer patients (METABRIC, n=1992)

|                                              | HR   | 95% C.I |      | P     |
|----------------------------------------------|------|---------|------|-------|
| FXR1                                         | 1.43 | 1.04    | 1.97 | 0.03  |
| Age                                          | 1.01 | 1.00    | 1.02 | 0.25  |
| Tumor size (>20mm vs <20mm)                  | 1.56 | 1.12    | 2.18 | 0.01  |
| Lymph node status (positive vs negative)     | 1.81 | 1.17    | 2.81 | 0.01  |
| Grade                                        |      |         |      |       |
| II vs I                                      | 1.48 | 0.63    | 3.48 | 0.37  |
| III vs I                                     | 1.76 | 0.74    | 4.16 | 0.2   |
| Stage                                        |      |         |      |       |
| II vs I                                      | 0.90 | 0.54    | 1.52 | 0.7   |
| III/IV vs I                                  | 2.47 | 1.29    | 4.73 | 0.01  |
| Estrogen receptor (positive vs negative)     | 1.14 | 0.70    | 1.87 | 0.59  |
| Progesterone receptor (positive vs negative) | 0.95 | 0.66    | 1.35 | 0.77  |
| HER2 (positive vs negative)                  | 1.62 | 1.11    | 2.37 | 0.01  |
| PAM50 subtype                                |      |         |      |       |
| HER2-enriched vs basal-like                  | 1.03 | 0.63    | 1.67 | 0.91  |
| LuminalA vs basal-like                       | 0.32 | 0.17    | 0.61 | 0.001 |
| LuminalB vs basal-like                       | 0.80 | 0.46    | 1.42 | 0.45  |
| Normal-like vs basal-like                    | 0.68 | 0.36    | 1.30 | 0.25  |

**Table S27. Clinical properties of the ovarian cancer patients used in the analysis.**

| Dataset  | Reference          | Samples | Death event /censor | Meidan OS (months) | Relapse event /censor | Meidan RFS (months) | Stage (1/2/3/4) | Grade (1/2/3)  | Serous samples | Debulk optimal /suboptimal |
|----------|--------------------|---------|---------------------|--------------------|-----------------------|---------------------|-----------------|----------------|----------------|----------------------------|
| GSE14764 | Denkert et al.2009 | 80      | 21/59               | 35                 | 58/22                 | 16.5                | 8/1/69/25       | 24/18/217      | 73             | 27/2                       |
| GSE26712 | Bonome et al.2008  | 195     | 129/56              | 38.8               | 153/32                | 38.8                | 0/0/146/36      | all high grade | 185            | 90/95                      |
| GSE9891  | Tothill et al.2008 | 285     | 110/175             | 28.5               | 193/90                | 15                  | 24/18/218/22    | 20/99/161      | 265            | 160/70                     |
| TCGA     | TCGA 2011          | 512     | 277/228             | 30.6               | 286/219               | 13.7                | 15/24/386/81    | 5/62/431       | 512            | 333/118                    |



**Table S28.** Univariate Cox proportional hazards analysis of FXR1 in early stage of ovarian cancer patients

| Dataset  | HR   | 95% C.I |       | P      | Patient numbers |
|----------|------|---------|-------|--------|-----------------|
| GSE9891  | 10.9 | 1.39    | 85.35 | 0.023  | 42              |
| TCGA     | 8.98 | 2.13    | 37.78 | 0.0027 | 39              |
| Combined | 5.38 | 1.95    | 14.82 | 0.0011 | 81              |

**Table S29.** Clinical characteristics of TCGA HNSC dataset (n=497)

|                                     |           |
|-------------------------------------|-----------|
| <b>Age</b>                          | 61±12     |
| <b>Gender</b>                       |           |
| Male                                | 285 (72%) |
| Female                              | 112 (28%) |
| <b>Stage</b>                        |           |
| I                                   | 24 (7%)   |
| II                                  | 61 (18%)  |
| III                                 | 65 (19%)  |
| IV                                  | 193 (56%) |
| <b>Grade</b>                        |           |
| well                                | 43 (11%)  |
| moderate                            | 236 (62%) |
| poor                                | 99 (26%)  |
| <b>Lymph node status</b>            |           |
| Negative                            | 105 (43%) |
| Positive                            | 142 (57%) |
| <b>Perineural invasion presence</b> |           |
| NO                                  | 142 (51%) |
| YES                                 | 136 (49%) |
| <b>HPV status by ISH testing</b>    |           |
| Negative                            | 52 (86%)  |
| Positive                            | 8 (14%)   |
| <b>HPV status by p16 testing</b>    |           |
| Negative                            | 61 (76%)  |
| Positive                            | 19 (24%)  |
| <b>Radiation therapy</b>            |           |
| NO                                  | 33 (47%)  |
| YES                                 | 37 (53%)  |
| <b>Neoadjuvant treatment</b>        |           |
| No                                  | 387 (97%) |
| Yes                                 | 9 (3%)    |
| <b>Death event</b>                  | 137 (28%) |
| <b>Relapse event</b>                | 46 (9%)   |

**Table S30.** Clinical characteristics of E-TABM-302 HNSC dataset (n=81)

---

|                                           |           |
|-------------------------------------------|-----------|
| Age                                       |           |
| >58                                       | 42 (52%)  |
| <58                                       | 39 (48%)  |
| Gender                                    |           |
| Male                                      | 76 (94%)  |
| Female                                    | 5 (6%)    |
| Stage                                     |           |
| II                                        | 7 (9%)    |
| III                                       | 23 (28%)  |
| IV                                        | 51 (63%)  |
| Lymph node status                         |           |
| Negative                                  | 17 (21%)  |
| Positive                                  | 64 (79%)  |
| Grade                                     |           |
| poor                                      | 19 (23%)  |
| moderate                                  | 38 (47%)  |
| well                                      | 24 (30%)  |
| HPV status                                |           |
| No                                        | 75 (93%)  |
| NA                                        | 6 (7%)    |
| Four-gene predictor                       |           |
| High risk                                 | 32 (44%)  |
| Low risk                                  | 41 (56%)  |
| Metastasis status                         |           |
| M                                         | 41 (51%)  |
| NM                                        | 40 (49%)  |
| Metastasis-free survival (years, mean±SD) |           |
| M                                         | 1.4±0.95  |
| NM                                        | 8.31±2.87 |

---

**Table S31. Multivariate Cox analysis of overall survival in TCGA HNSC dataset**

| Covariates                        | HR   | 95% C.I |      | P     |
|-----------------------------------|------|---------|------|-------|
| FXR1                              | 1.56 | 1.01    | 2.40 | 0.04* |
| Age                               | 1.03 | 1.00    | 1.06 | 0.02* |
| Gender (Male vs Female)           | 1.00 | 0.58    | 1.74 | 1.00  |
| Stage (III,IV vs I,II)            | 1.85 | 0.75    | 4.58 | 0.18  |
| Grade (Well vs Moderate-poor)     | 0.71 | 0.27    | 1.86 | 0.48  |
| Lymph node (positive vs negative) | 1.30 | 0.71    | 2.37 | 0.40  |
| Smoking history                   |      |         |      |       |
| Former vs Current                 | 0.57 | 0.34    | 0.95 | 0.03* |
| Never vs Current                  | 0.61 | 0.28    | 1.32 | 0.21  |

**Table S32.** Multivariate Cox analysis of metastasis-free survival in E-TABM-302 HNSC cohort (n=81)

|                                   | HR   | 95% C.I |       | P     |
|-----------------------------------|------|---------|-------|-------|
| FXR1                              | 2.25 | 1.21    | 4.18  | 0.01* |
| Age                               | 0.96 | 0.93    | 1.00  | 0.05* |
| Gender(male vs female)            | 1.21 | 0.28    | 5.16  | 0.80  |
| Grade(moderate-poor vs well)      | 0.61 | 0.29    | 1.28  | 0.19  |
| Stage (III vs II)                 | 0.11 | 0.02    | 0.69  | 0.02* |
| Stage (IV vs II)                  | 0.26 | 0.05    | 1.55  | 0.14  |
| Lymph node (positive vs negative) | 3.23 | 0.75    | 14.01 | 0.12  |

**Table S33.** Multivariable Cox analysis of OS in TCGA stage I lung ADC patients (n=255)

|      | HR   | 95% C.I. |      | P <sup>a</sup> |
|------|------|----------|------|----------------|
| FXR1 | 2.46 | 1.25     | 4.86 | 0.009*         |
| FXR2 | 0.85 | 0.43     | 1.68 | 0.64           |
| FMR1 | 0.75 | 0.37     | 1.50 | 0.41           |

<sup>a</sup> Adjusted for age, gender and smoking history

**Table S34.** Multivariable Cox analysis of OS in TCGA HNSC dataset

|      | HR   | 95% C.I. |      | P     |
|------|------|----------|------|-------|
| FXR1 | 1.56 | 1.01     | 2.40 | 0.04* |
| FMR1 | 0.96 | 0.55     | 1.68 | 0.88  |
| FXR2 | 0.87 | 0.49     | 1.55 | 0.64  |

HR: adjusted for age, gender, stage, grade, lymph node status and smoking history.
